# Supplementary material for: Artificial intelligence-enabled fully automated detection of cardiac amyloidosis using electrocardiograms and echocardiograms
Source: PubMed Central journal article supplement (PMC8113484; doi:10.1038/s41467-021-22877-8), 2021-05-11
Supplement: 41467_2021_22877_MOESM1_ESM.pdf [file 41467_2021_22877_MOESM1_ESM.pdf]

# Supplementary Materials

## Artificial Intelligence-Enabled Fully Automated Detection of Cardiac Amyloidosis Using Electrocardiograms and Echocardiograms

Shinichi Goto<sup>1,2,5</sup>, Keitaro Mahara<sup>3</sup>, Lauren Beussink-Nelson<sup>4</sup>, Hidehiko Ikura<sup>5</sup>, Yoshinori Katsumata<sup>5</sup>, Jin Endo<sup>5</sup>, Hanna K. Gaggin<sup>2,6</sup>, Sanjiv J. Shah<sup>4</sup>, Yuji Itabashi<sup>5</sup>, Calum A MacRae<sup>1,2</sup>, Rahul C Deo<sup>1,2,7,8\*</sup>

<sup>1</sup>One Brave Idea and Division of Cardiovascular Medicine, Department of Medicine, Brigham and Women's Hospital, Boston, MA, USA

<sup>2</sup>Harvard Medical School, Boston, MA, USA

<sup>3</sup>Department of Epidemiology, Harvard T.H. Chan School of Public Health, Boston, MA, USA

<sup>4</sup>Division of Cardiology, Feinberg Cardiovascular Research Institute, Northwestern University Feinberg School of Medicine, Chicago, IL, USA

<sup>5</sup>Department of Cardiology, Keio University School of Medicine, Shinjuku, Tokyo, Japan

<sup>6</sup>Division of Cardiology, Massachusetts General Hospital, Boston, MA, USA

<sup>7</sup>Center for Digital Health Innovation and Department of Medicine, University of California San Francisco, San Francisco, CA, USA

<sup>8</sup>Department of Preventive Medicine, Northwestern University Feinberg School of Medicine, Chicago, IL, USA

**\*To whom correspondence should be addressed:**

Rahul C. Deo, MD, PhD

One Brave Idea / Division of Cardiovascular Medicine, Department of Medicine, Brigham and Women's Hospital, Boston, MA, USA

[rdeo@bwh.harvard.edu](mailto:rdeo@bwh.harvard.edu)

## Supplementary Tables

**Supplementary Table 1. Method of diagnosis for patients in ECG cohort**

|                                   | BWH       |           |           | MGH       |           |          |
|-----------------------------------|-----------|-----------|-----------|-----------|-----------|----------|
|                                   | Overall   | ATTR      | AL        | Overall   | ATTR      | AL       |
| Number of patients                | 144       | 91        | 47        | 52        | 31        | 15       |
| Method of Diagnosis               |           |           |           |           |           |          |
| Myocardial biopsy, n (%)          | 46 (31.9) | 13 (27.7) | 32 (35.2) | 8 (15.4)  | 6 (19.4)  | 2 (13.3) |
| PYP scan, n (%)                   | 44 (30.6) | 44 (30.6) | N/A       | 16 (30.8) | 16 (51.6) | N/A      |
| Fat pad biopsy + TTE, n (%)       | 2 (1.4)   | 0 (0.0)   | 2 (4.3)   | 2 (3.8)   | 0 (0.0)   | 2 (13.3) |
| Cardiac MRI, n (%)                | 28 (19.4) | 10 (11.0) | 16 (34.0) | 15 (28.8) | 7 (22.6)  | 7 (46.7) |
| Genetic test, n (%)               | 1 (0.7)   | 1 (1.1)   | N/A       | 1 (1.9)   | 1 (3.2)   | N/A      |
| Biopsy (other) + TTE, n (%)       | 11 (7.6)  | 0 (0.0)   | 11 (23.4) | 5 (9.6)   | 0 (0.0)   | 4 (26.6) |
| Unknown, n (%)                    | 12 (8.3)  | 4 (4.3)   | 5 (10.6)  | 5 (9.6)   | 1 (3.2)   | 0 (0.0)  |
| Days after diagnosis of first ECG |           |           |           |           |           |          |
| ≤ -365, n (%)                     | 21 (14.6) | 15 (16.5) | 6 (12.8)  | 17 (32.7) | 14 (45.2) | 2 (13.3) |
| -364 to - 180, n (%)              | 3 (2.1)   | 2 (2.2)   | 1 (2.1)   | 2 (3.8)   | 2 (6.5)   | 0 (0.0)  |
| -179 to -90, n (%)                | 3 (2.1)   | 2 (2.2)   | 1 (2.1)   | 3 (5.8)   | 2 (6.5)   | 0 (0.0)  |
| -89 to -30, n (%)                 | 8 (5.6)   | 6 (6.6)   | 2 (4.3)   | 4 (7.7)   | 1 (3.2)   | 3 (20.0) |
| -29 to -1                         | 18 (12.5) | 10 (11.0) | 7 (14.9)  | 4 (7.7)   | 2 (6.5)   | 2 (13.3) |
| 0 to 29, n (%)                    | 27 (18.8) | 13 (14.3) | 14 (29.8) | 5 (9.6)   | 2 (6.5)   | 3 (20.0) |
| 30 to 89                          | 17 (11.8) | 12 (13.2) | 3 (6.4)   | 0 (0.0)   | 0 (0.0)   | 0 (0.0)  |
| 90 to 179, n (%)                  | 6 (4.2)   | 6 (6.6)   | 0 (0.0)   | 2 (3.8)   | 0 (0.0)   | 2 (13.3) |
| 180 to 364, n (%)                 | 9 (6.2)   | 6 (6.6)   | 3 (6.4)   | 2 (3.8)   | 1 (3.2)   | 1 (6.7)  |
| 365 ≤ , n (%)                     | 17 (11.8) | 13 (14.3) | 4 (8.5)   | 7 (13.5)  | 5 (16.1)  | 2 (13.3) |
| Unknown, n (%)                    | 15 (10.4) | 6 (6.6)   | 6 (12.8)  | 6 (11.5)  | 0 (0.0)   | 2 (6.5)  |

All the patients diagnosed with cardiac MRI was confirmed with either biopsy or PYP scan. The negative value in “Days after diagnosis of first ECG” indicates the date before diagnosis. N represents the number of patients. PYP scan: Tc-99m pyrophosphate scan, TTE: transthoracic echocardiography, ECG: electrocardiogram, MRI: magnetic resonance imaging, ATTR: amyloid transthyretin, AL: amyloid light-chain, BWH: Brigham and Women’s Hospital, MGH: Massachusetts General Hospital.

**Supplementary Table 2. Study date relative to diagnosis in ECG cohort**

|                      | BWH        |            |           | MGH       |           |           |
|----------------------|------------|------------|-----------|-----------|-----------|-----------|
|                      | Overall    | ATTR       | AL        | Overall   | ATTR      | AL        |
| Number of studies    | 669        | 411        | 241       | 405       | 270       | 89        |
| Days after diagnosis |            |            |           |           |           |           |
| ≤ -365, n (%)        | 98 (14.6)  | 70 (17.0)  | 28 (11.6) | 54 (13.3) | 51 (18.9) | 2 (2.2)   |
| -364 to - 180, n (%) | 9 (1.3)    | 8 (1.9)    | 1 (0.4)   | 35 (0.6)  | 35 (13.0) | 0 (0.0)   |
| -179 to -90, n (%)   | 3 (0.4)    | 2 (0.5)    | 1 (0.4)   | 23 (5.7)  | 21 (7.8)  | 0 (0.0)   |
| -89 to -30, n (%)    | 15 (2.2)   | 11 (2.7)   | 4 (1.7)   | 21 (5.2)  | 10 (3.7)  | 9 (10.1)  |
| -29 to -1            | 38 (5.7)   | 24 (5.8)   | 10 (4.1)  | 29 (7.2)  | 16 (5.9)  | 12 (13.5) |
| 0 to 29, n (%)       | 92 (13.8)  | 35 (8.5)   | 56 (23.2) | 30 (7.4)  | 20 (7.4)  | 8 (9.0)   |
| 30 to 89             | 68 (10.2)  | 27 (6.6)   | 35 (14.5) | 19 (4.7)  | 14 (5.2)  | 5 (5.6)   |
| 90 to 179, n (%)     | 34 (5.1)   | 20 (4.9)   | 14 (5.8)  | 20 (4.9)  | 9 (3.3)   | 11 (12.4) |
| 180 to 364, n (%)    | 67 (10.0)  | 48 (11.7)  | 18 (7.5)  | 35 (8.6)  | 11 (4.1)  | 23 (25.8) |
| 365 ≤, n (%)         | 182 (27.2) | 133 (32.4) | 48 (19.9) | 85 (21.0) | 65 (24.1) | 19 (21.3) |
| Unknown, n (%)       | 63 (9.4)   | 33 (8.0)   | 26 (10.8) | 54 (13.3) | 18 (6.7)  | 0 (0.0)   |

The negative value in “Days after diagnosis” indicates the date before diagnosis. N represents the number of studies. ECG: electrocardiogram, ATTR: amyloid transthyretin, AL: amyloid light-chain, BWH: Brigham and Women’s Hospital, MGH: Massachusetts General Hospital.

**Supplementary Table 3. Method of diagnosis for patients in echocardiogram cohort**

|                                              | BWH       |           |           | MGH       |           |          | Keio      |           |          |
|----------------------------------------------|-----------|-----------|-----------|-----------|-----------|----------|-----------|-----------|----------|
|                                              | Overall   | ATTR      | AL        | Overall   | ATTR      | AL       | Overall   | ATTR      | AL       |
| Number of patients                           | 134       | 96        | 38        | 41        | 21        | 17       | 52        | 45        | 7        |
| Method of Diagnosis                          |           |           |           |           |           |          |           |           |          |
| Myocardial biopsy, n (%)                     | 34 (25.4) | 23 (24.0) | 11 (28.9) | 6 (14.6)  | 3 (14.3)  | 3 (17.6) | 36 (69.2) | 34 (75.6) | 2 (28.6) |
| PYP scan, n (%)                              | 55 (41.0) | 55 (57.3) | N/A       | 11 (26.8) | 11 (52.4) | N/A      | 11 (21.2) | 11 (24.4) | N/A      |
| Fat pad biopsy + TTE, n (%)                  | 0 (0.0)   | 0 (0.0)   | 0 (0.0)   | 2 (4.9)   | 0 (0.0)   | 2 (11.8) | 3 (5.8)   | 0 (0.0)   | 3 (42.9) |
| Cardiac MRI, n (%)                           | 35 (26.1) | 13 (13.5) | 35 (26.1) | 15 (36.6) | 7 (33.3)  | 7 (41.2) | 0 (0.0)   | 0 (0.0)   | 0 (0.0)  |
| Genetic test, n (%)                          | 1 (0.7)   | 1 (1.0)   | N/A       | 0 (0.0)   | 0 (0.0)   | N/A      | 0 (0.0)   | 0 (0.0)   | 0 (0.0)  |
| Biopsy (other) + TTE, n (%)                  | 6 (4.5)   | 2 (2.1)   | 3 (7.9)   | 5 (12.2)  | 0 (0.0)   | 5 (29.4) | 2 (3.8)   | 0 (0.0)   | 2 (28.6) |
| Unknown, n (%)                               | 3 (2.2)   | 2 (2.1)   | 1 (0.7)   | 2 (4.9)   | 0 (0.0)   | 0 (0.0)  | 0 (0.0)   | 0 (0.0)   | 0 (0.0)  |
| Days after diagnosis of first echocardiogram |           |           |           |           |           |          |           |           |          |
| ≤ -365, n (%)                                | 22 (16.4) | 11 (11.5) | 11 (28.9) | 9 (22.0)  | 8 (38.1)  | 0 (0.0)  | 2 (3.8)   | 2 (4.4)   | 0 (0.0)  |
| -364 to -180, n (%)                          | 5 (3.7)   | 4 (4.2)   | 1 (2.6)   | 2 (4.9)   | 2 (9.5)   | 0 (0.0)  | 2 (3.8)   | 0 (0.0)   | 2 (28.6) |
| -179 to -90, n (%)                           | 2 (1.5)   | 0 (0.0)   | 2 (2.1)   | 0 (0.0)   | 0 (0.0)   | 0 (0.0)  | 3 (5.8)   | 2 (4.4)   | 1 (14.3) |
| -89 to -30, n (%)                            | 3 (2.2)   | 0 (0.0)   | 3 (3.1)   | 4 (9.8)   | 1 (4.8)   | 3 (17.6) | 10 (19.2) | 8 (17.8)  | 2 (28.6) |
| -29 to -1                                    | 14 (10.4) | 2 (5.3)   | 12 (12.5) | 6 (14.6)  | 2 (9.5)   | 4 (23.5) | 10 (19.2) | 8 (17.8)  | 2 (28.6) |
| 0 to 29, n (%)                               | 24 (17.9) | 15 (15.6) | 9 (23.7)  | 1 (2.4)   | 0 (0.0)   | 1 (5.9)  | 0 (0.0)   | 0 (0.0)   | 0 (0.0)  |
| 30 to 89                                     | 12 (9.0)  | 11 (11.5) | 1 (2.6)   | 0 (0.0)   | 0 (0.0)   | 0 (0.0)  | 4 (7.7)   | 4 (8.9)   | 0 (0.0)  |
| 90 to 179, n (%)                             | 10 (7.5)  | 8 (8.3)   | 2 (5.3)   | 4 (9.8)   | 0 (0.0)   | 4 (23.5) | 4 (7.7)   | 4 (8.9)   | 0 (0.0)  |
| 180 to 364, n (%)                            | 14 (10.4) | 9 (9.4)   | 5 (13.2)  | 4 (9.8)   | 1 (4.8)   | 3 (17.6) | 11 (21.2) | 11 (24.4) | 0 (0.0)  |
| 365 ≤, n (%)                                 | 24 (17.9) | 18 (18.8) | 6 (15.8)  | 9 (22.0)  | 1 (4.8)   | 2 (11.8) | 6 (11.5)  | 6 (13.3)  | 0 (0.0)  |
| Unknown, n (%)                               | 4 (3.0)   | 3 (3.1)   | 1 (2.6)   | 2 (4.9)   | 0 (0.0)   | 0 (0.0)  | 0 (0.0)   | 0 (0.0)   | 0 (0.0)  |

All the patients diagnosed with cardiac MRI was confirmed with either biopsy or PYP scan. The negative value in “Days after diagnosis of first echocardiogram” indicates the date before diagnosis. N represents the number of patients. PYP scan: Tc-99m pyrophosphate scan, TTE: transthoracic echocardiography, MRI: magnetic resonance imaging, ATTR: amyloid transthyretin, AL: amyloid light-chain, BWH: Brigham and Women’s Hospital, MGH: Massachusetts General Hospital, Keio: Keio University.

**Supplementary Table 4. Study date relative to diagnosis in echocardiogram cohort**

|                      | BWH        |            |           | MGH       |           |           | Keio      |           |          |
|----------------------|------------|------------|-----------|-----------|-----------|-----------|-----------|-----------|----------|
|                      | Overall    | ATTR       | AL        | Overall   | ATTR      | AL        | Overall   | ATTR      | AL       |
| Number of studies    | 513        | 362        | 151       | 110       | 54        | 44        | 118       | 95        | 23       |
| Days after diagnosis |            |            |           |           |           |           |           |           |          |
| ≤ -365, n (%)        | 39 (7.6)   | 16 (4.4)   | 23 (15.2) | 18 (16.4) | 16 (29.6) | 0 (0.0)   | 4 (3.4)   | 4 (4.2)   | 0 (0.0)  |
| -364 to - 180, n (%) | 15 (2.9)   | 5 (1.4)    | 10 (6.6)  | 7 (6.4)   | 7 (13.0)  | 0 (0.0)   | 2 (1.7)   | 0 (0.0)   | 2 (8.7)  |
| -179 to -90, n (%)   | 7 (1.4)    | 5 (1.4)    | 2 (1.3)   | 2 (1.8)   | 1 (1.9)   | 0 (0.0)   | 3 (2.5)   | 2 (2.1)   | 1 (4.3)  |
| -89 to -30, n (%)    | 6 (1.2)    | 5 (1.4)    | 1 (0.7)   | 6 (5.5)   | 3 (5.6)   | 3 (6.8)   | 11 (9.3)  | 8 (8.4)   | 3 (13.0) |
| -29 to -1            | 24 (4.7)   | 19 (5.2)   | 5 (3.3)   | 8 (7.3)   | 4 (7.4)   | 4 (9.1)   | 13 (11.0) | 9 (9.5)   | 4 (17.4) |
| 0 to 29, n (%)       | 35 (6.8)   | 19 (5.2)   | 16 (10.6) | 5 (4.5)   | 2 (3.7)   | 2 (4.5)   | 6 (5.1)   | 5 (5.3)   | 1 (4.3)  |
| 30 to 89             | 23 (4.5)   | 18 (5.0)   | 5 (3.3)   | 4 (3.6)   | 0 (0.0)   | 4 (9.1)   | 11 (9.3)  | 6 (6.3)   | 5 (21.7) |
| 90 to 179, n (%)     | 23 (4.5)   | 15 (4.1)   | 8 (5.3)   | 7 (6.4)   | 1 (1.9)   | 6 (13.6)  | 8 (6.8)   | 8 (8.4)   | 0 (0.0)  |
| 180 to 364, n (%)    | 58 (11.3)  | 44 (12.2)  | 14 (9.3)  | 11 (10.0) | 4 (7.4)   | 7 (15.9)  | 21 (17.8) | 19 (20.0) | 2 (8.7)  |
| 365 ≤, n (%)         | 267 (52.0) | 204 (56.4) | 63 (41.7) | 34 (30.9) | 16 (29.6) | 18 (40.9) | 39 (33.1) | 34 (35.8) | 5 (21.7) |
| Unknown, n (%)       | 16 (3.1)   | 12 (3.3)   | 4 (2.6)   | 8 (7.3)   | 0 (0.0)   | 0 (0.0)   | 0 (0.0)   | 0 (0.0)   | 0 (0.0)  |

The negative value in “Days after diagnosis” indicates the date before diagnosis. N represents the number of studies. ATTR: amyloid transthyretin, AL: amyloid light-chain, BWH: Brigham and Women’s Hospital, MGH: Massachusetts General Hospital, Keio: Keio University.

**Supplementary Table 5. Study-level demographic information of controls of HCM, HTN and ESRD**

|                     | BWH             |                 |                 | MGH             |                 |                 | UCSF            |                 | Keio            |                 |
|---------------------|-----------------|-----------------|-----------------|-----------------|-----------------|-----------------|-----------------|-----------------|-----------------|-----------------|
|                     | HCM             | ESRD            | HTN             | HCM             | ESRD            | HTN             | HCM             | HTN             | HCM             | HTN             |
| Number of studies   | 258             | 1,180           | 593             | 525             | 939             | 351             | 262             | 1,450           | 120             | 235             |
| Age, years $\pm$ SD | 55.1 $\pm$ 13.9 | 60.1 $\pm$ 15.2 | 65.3 $\pm$ 18.4 | 60.1 $\pm$ 15.2 | 63.6 $\pm$ 14.7 | 70.1 $\pm$ 15.1 | 58.9 $\pm$ 14.9 | 66.7 $\pm$ 16.7 | 59.6 $\pm$ 13.5 | 73.1 $\pm$ 13.1 |
| Age Groups          |                 |                 |                 |                 |                 |                 |                 |                 |                 |                 |
| $\leq$ 30, n (%)    | 13 (5.0)        | 45 (3.8)        | 43 (7.3)        | 24 (4.6)        | 17 (1.8)        | 6 (1.7)         | 11 (4.2)        | 69 (4.8)        | 3 (2.5)         | 2 (0.9)         |
| 30-50, n (%)        | 72 (27.9)       | 234 (19.8)      | 55 (9.3)        | 93 (17.7)       | 157 (16.7)      | 21 (6.0)        | 64 (24.4)       | 138 (9.5)       | 23 (19.2)       | 14 (6.0)        |
| 50-70, n (%)        | 137 (53.1)      | 532 (45.1)      | 236 (39.8)      | 264 (50.3)      | 396 (42.2)      | 136 (38.7)      | 126 (48.1)      | 593 (40.9)      | 64 (53.3)       | 67 (28.5)       |
| 70-90, n (%)        | 36 (14.0)       | 369 (31.3)      | 236 (39.8)      | 141 (26.9)      | 353 (37.6)      | 165 (47.0)      | 60 (22.9)       | 594 (41.0)      | 30 (25.0)       | 139 (59.1)      |
| >90, n (%)          | 0 (0.0)         | 0 (0.0)         | 23 (3.9)        | 3 (0.6)         | 16 (1.7)        | 23 (6.6)        | 1 (0.4)         | 56 (3.9)        | 0 (0.0)         | 13 (5.5)        |
| HR, bpm $\pm$ SD    | 70.6 $\pm$ 16.6 | 77.8 $\pm$ 18.7 | 68.9 $\pm$ 14.5 | 65.8 $\pm$ 15.6 | 75.5 $\pm$ 17.9 | 67.8 $\pm$ 16.1 | 64.8 $\pm$ 17.3 | 72.1 $\pm$ 17.7 | 61.5 $\pm$ 13.1 | 67.3 $\pm$ 12.7 |
| Manufacture         |                 |                 |                 |                 |                 |                 |                 |                 |                 |                 |
| Philips, n (%)      | 201 (77.9)      | 867 (73.5)      | 432 (72.8)      | 487 (92.8)      | 910 (96.9)      | 334 (95.2)      | 182 (69.5)      | 1,158 (79.9)    | 4 (3.3)         | 64 (27.2)       |
| GE, n (%)           | 55 (21.3)       | 296 (25.1)      | 160 (27.0)      | 36 (6.9)        | 29 (3.1)        | 17 (4.8)        | 80 (30.5)       | 290 (20.0)      | 115 (95.8)      | 131 (55.7)      |
| Agilent, n (%)      | 1 (0.1)         | 1 (0.1)         | 0 (0.0)         | 0 (0.0)         | 0 (0.0)         | 0 (0.0)         | 0 (0.0)         | 0 (0.0)         | 0 (0.0)         | 0 (0.0)         |
| SonoSite, n (%)     | 1 (0.1)         | 1 (0.1)         | 0 (0.0)         | 0 (0.0)         | 0 (0.0)         | 0 (0.0)         | 0 (0.0)         | 0 (0.0)         | 0 (0.0)         | 0 (0.0)         |
| SIEMENS, n (%)      | 3 (0.4)         | 7 (0.6)         | 1 (0.2)         | 0 (0.0)         | 0 (0.0)         | 0 (0.0)         | 0 (0.0)         | 1 (0.1)         | 0 (0.0)         | 0 (0.0)         |
| ACUSON, n (%)       | 0 (0.0)         | 0 (0.0)         | 0 (0.0)         | 0 (0.0)         | 0 (0.0)         | 0 (0.0)         | 0 (0.0)         | 1 (0.1)         | 0 (0.0)         | 0 (0.0)         |
| ATL, n (%)          | 0 (0.0)         | 0 (0.0)         | 0 (0.0)         | 2 (0.4)         | 0 (0.0)         | 0 (0.0)         | 0 (0.0)         | 0 (0.0)         | 0 (0.0)         | 0 (0.0)         |
| TOSHIBA, n (%)      | 0 (0.0)         | 0 (0.0)         | 0 (0.0)         | 0 (0.0)         | 0 (0.0)         | 0 (0.0)         | 0 (0.0)         | 0 (0.0)         | 1 (0.8)         | 40 (17.0)       |

N represents the number of studies. HR: heart rate, BWH: Brigham and Women's Hospital, MGH: Massachusetts General Hospital, UCSF: University of California San Francisco, Keio: Keio University. HCM: hypertrophic cardio myopathy. ESRD: end-stage renal disease. HTN: hypertension.

**Supplementary Table 6. Patient-level demographic information of controls of HCM, HTN and ESRD**

|                    | BWH         |             |             | MGH         |             |             | UCSF        |             | Keio        |             |
|--------------------|-------------|-------------|-------------|-------------|-------------|-------------|-------------|-------------|-------------|-------------|
|                    | HCM         | ESRD        | HTN         | HCM         | ESRD        | HTN         | HCM         | HTN         | HCM         | HTN         |
| Number of patients | 114         | 528         | 538         | 243         | 476         | 318         | 159         | 1,360       | 54          | 228         |
| Age, years ± SD    | 55.8 ± 13.6 | 60.9 ± 15.1 | 65.0 ± 18.2 | 59.6 ± 15.1 | 64.0 ± 14.3 | 69.6 ± 15.2 | 57.3 ± 15.8 | 66.7 ± 16.7 | 60.7 ± 13.3 | 72.9 ± 13.2 |
| Age Groups         |             |             |             |             |             |             |             |             |             |             |
| ≤30, n (%)         | 6 (5.3)     | 21 (4.0)    | 40 (7.4)    | 13 (5.3)    | 10 (2.1)    | 6 (1.9)     | 11 (6.9)    | 68 (5.0)    | 1 (1.9)     | 2 (0.9)     |
| 30-50, n (%)       | 30 (26.3)   | 99 (18.8)   | 50 (9.3)    | 44 (18.1)   | 67 (14.1)   | 20 (6.3)    | 41 (25.8)   | 129 (9.5)   | 10 (18.5)   | 14 (6.1)    |
| 50-70, n (%)       | 65 (57.0)   | 234 (44.3)  | 219 (40.7)  | 122 (50.2)  | 214 (45.0)  | 124 (39.0)  | 74 (46.5)   | 554 (40.7)  | 28 (51.9)   | 66 (28.9)   |
| 70-90, n (%)       | 13 (11.4)   | 174 (33.0)  | 208 (38.7)  | 63 (25.9)   | 179 (37.6)  | 150 (47.2)  | 33 (20.8)   | 554 (40.7)  | 15 (27.8)   | 134 (58.8)  |
| >90, n (%)         | 0 (0.0)     | 0 (0.0)     | 21 (3.9)    | 1 (0.4)     | 6 (1.3)     | 18 (5.7)    | 0 (0.0)     | 55 (4.0)    | 0 (0.0)     | 12 (5.3)    |
| Female, n (%)      | 35 (30.7)   | 222 (42.0)  | 253 (47.0)  | 84 (34.6)   | 162 (34.0)  | 155 (48.7)  | 68 (42.8)   | 683 (50.4)  | 21 (38.9)   | 119 (52.2)  |

N represents the number of patients. BWH: Brigham and Women's Hospital, MGH: Massachusetts General Hospital, UCSF: University of California San Francisco, Keio: Keio University Hospital. Age is calculated as mean of all studies for a patient. HCM: hypertrophic cardio myopathy. ESRD: end-stage renal disease. HTN: hypertension.

## Supplementary Figures.

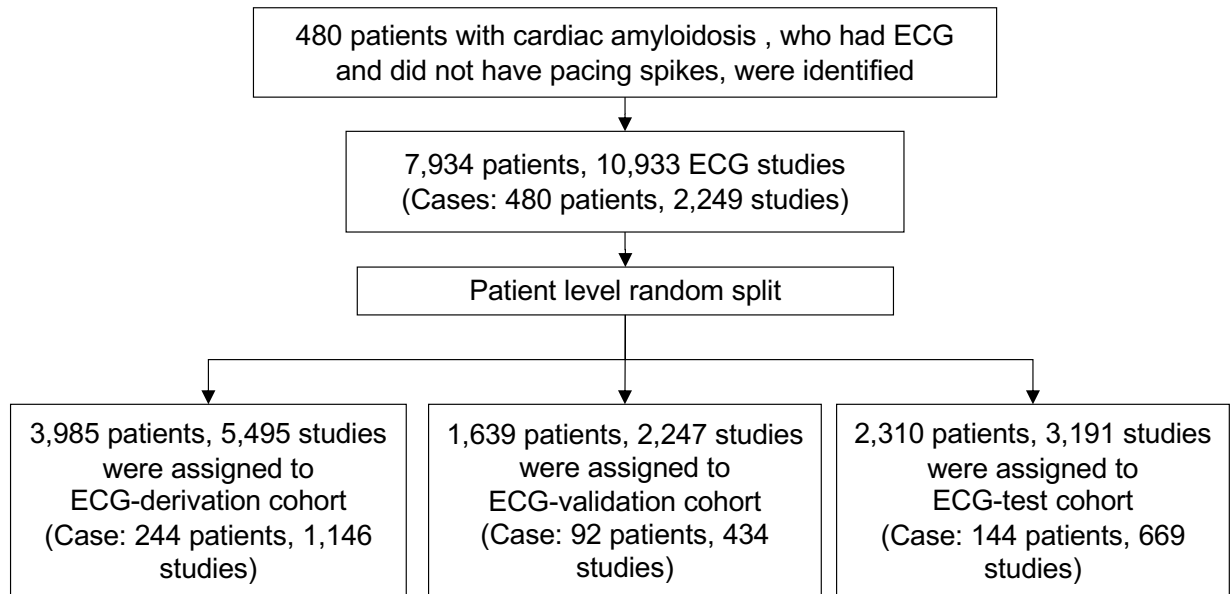

**Supplementary Figure 1. Cohort selection procedure for the BWH ECG cohort.**

ECG: electrocardiogram, BWH: Brigham and Women's Hospital.



## Overall

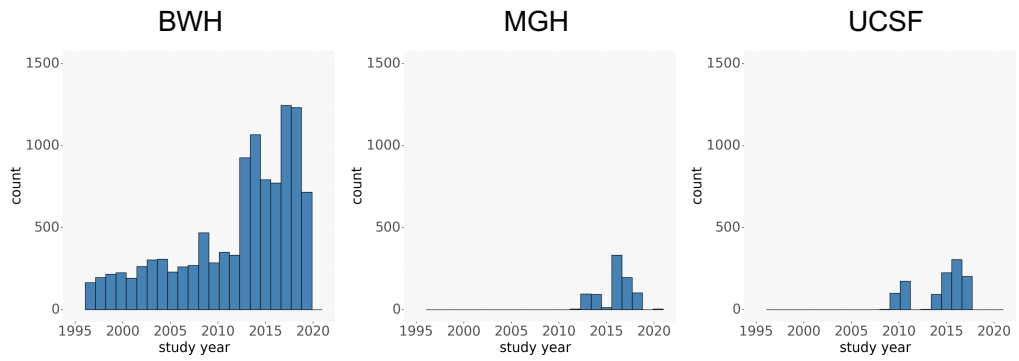

## Cases

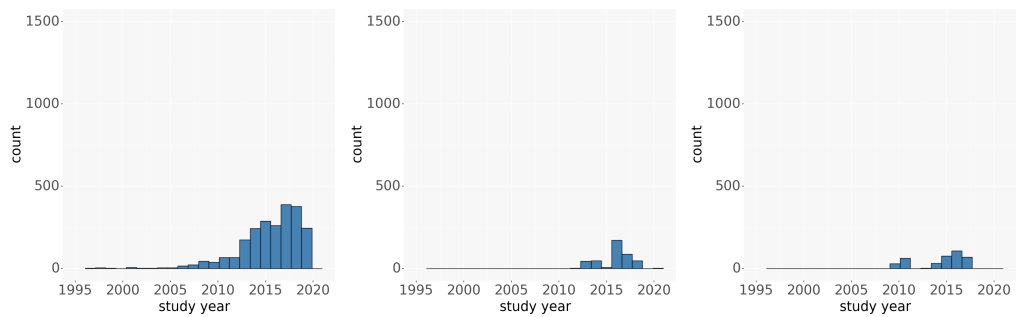

## Controls

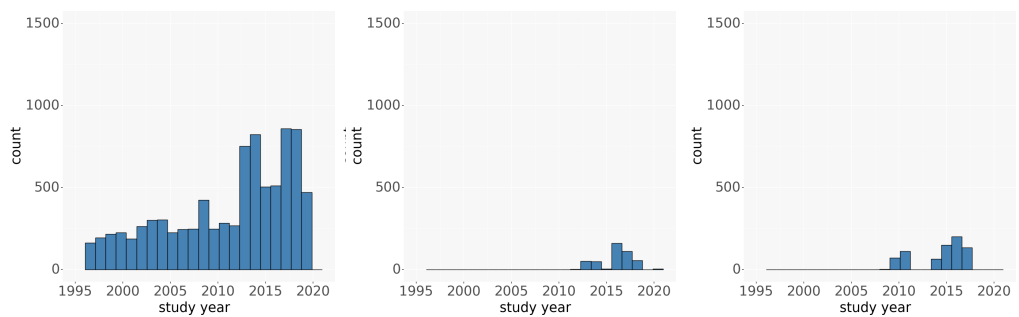

### Supplementary Figure 2. Histogram of the dates of ECG studies

Source data are provided as a Source Data file. ECG: electrocardiogram, BWH: Brigham and Women's Hospital, MGH: Massachusetts General Hospital, UCSF: University of California San Francisco.

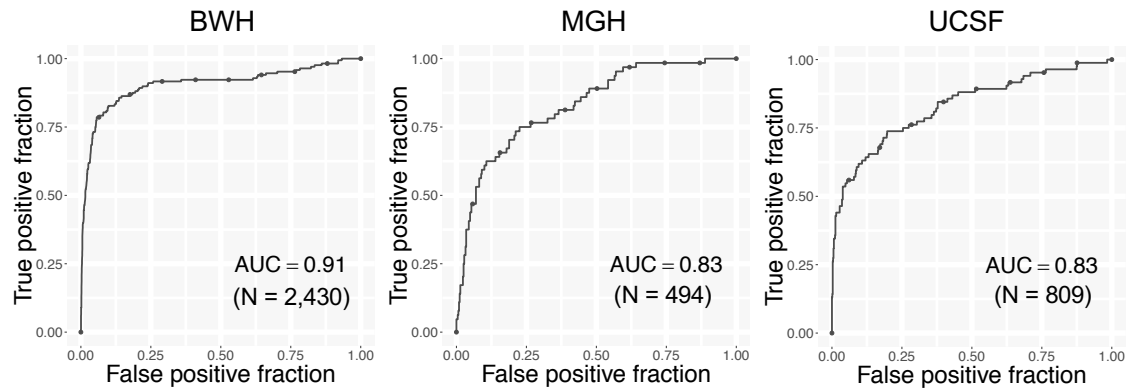

**Supplementary Figure 3. Performance of the ECG model on the earliest available study for each patient**

ROC plots for detecting cardiac amyloidosis for each institution. The performance on the test dataset is shown for BWH. Source data are provided as a Source Data file. ECG: electrocardiogram, BWH: Brigham and Women's Hospital, MGH: Massachusetts General Hospital, UCSF: University of California San Francisco. AUC: area under the curve.

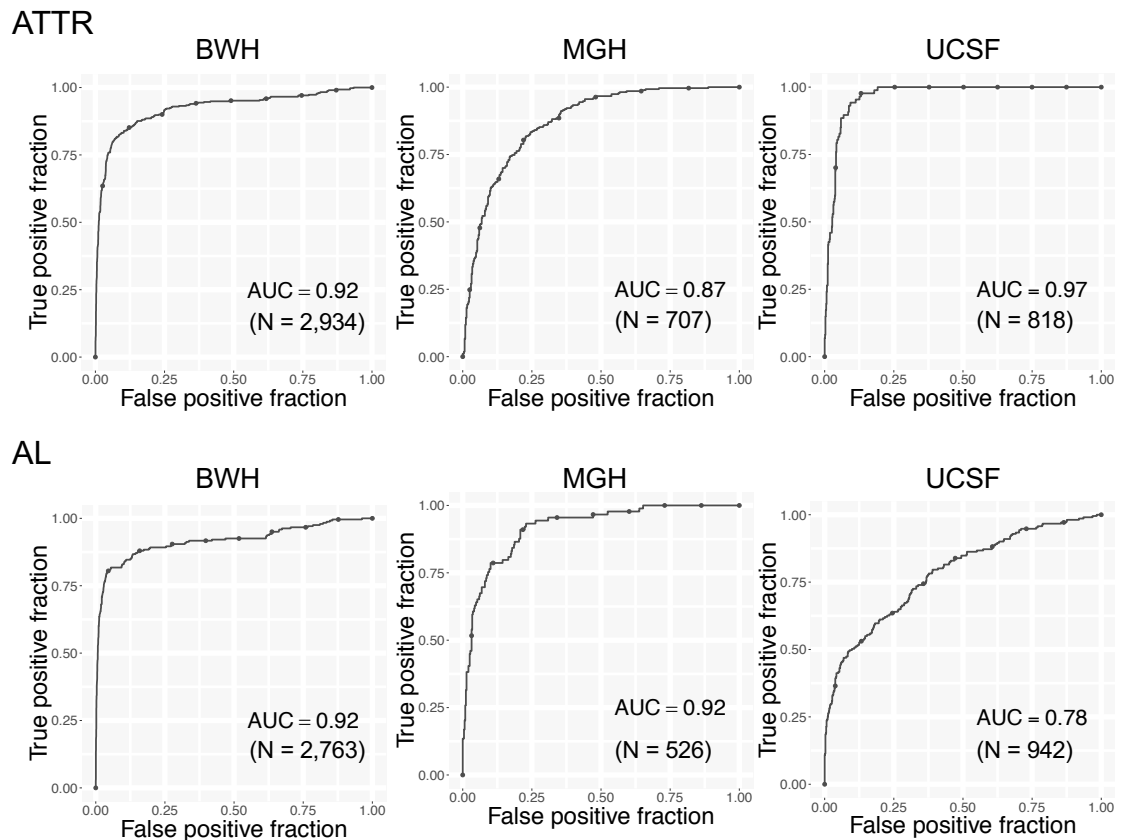

**Supplementary Figure 4. Performance of ECG model by amyloid subtype**

ROC plots for detecting cardiac amyloidosis on amyloid subtype for each institution. The performance on a test dataset is shown for BWH. N is the numbers of studies. Source data are provided as a Source Data file. ECG: electrocardiogram, ATTR: amyloid transthyretin, AL: amyloid light-chain, BWH: Brigham and Women's Hospital, MGH: Massachusetts General Hospital, UCSF: University of California San Francisco. AUC: area under the curve.

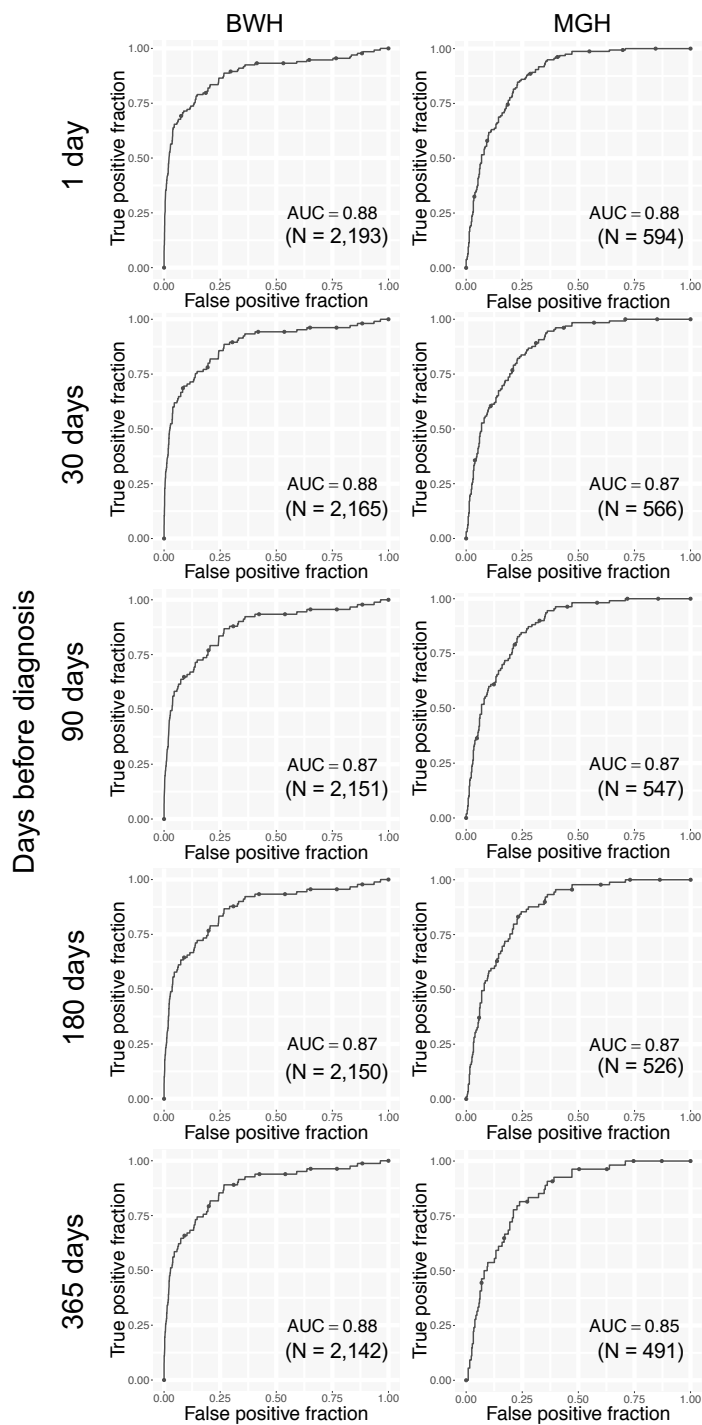

**Supplementary Figure 5. Performance of the ECG model using studies collected up to various time points prior to the diagnosis.**

ROC plots for detecting cardiac amyloidosis on datasets for each institution. The performance on a test dataset is shown for BWH. Source data are provided as a Source Data file. ECG: electrocardiogram, BWH: Brigham and Women's Hospital, MGH: Massachusetts General Hospital, AUC: area under the curve.

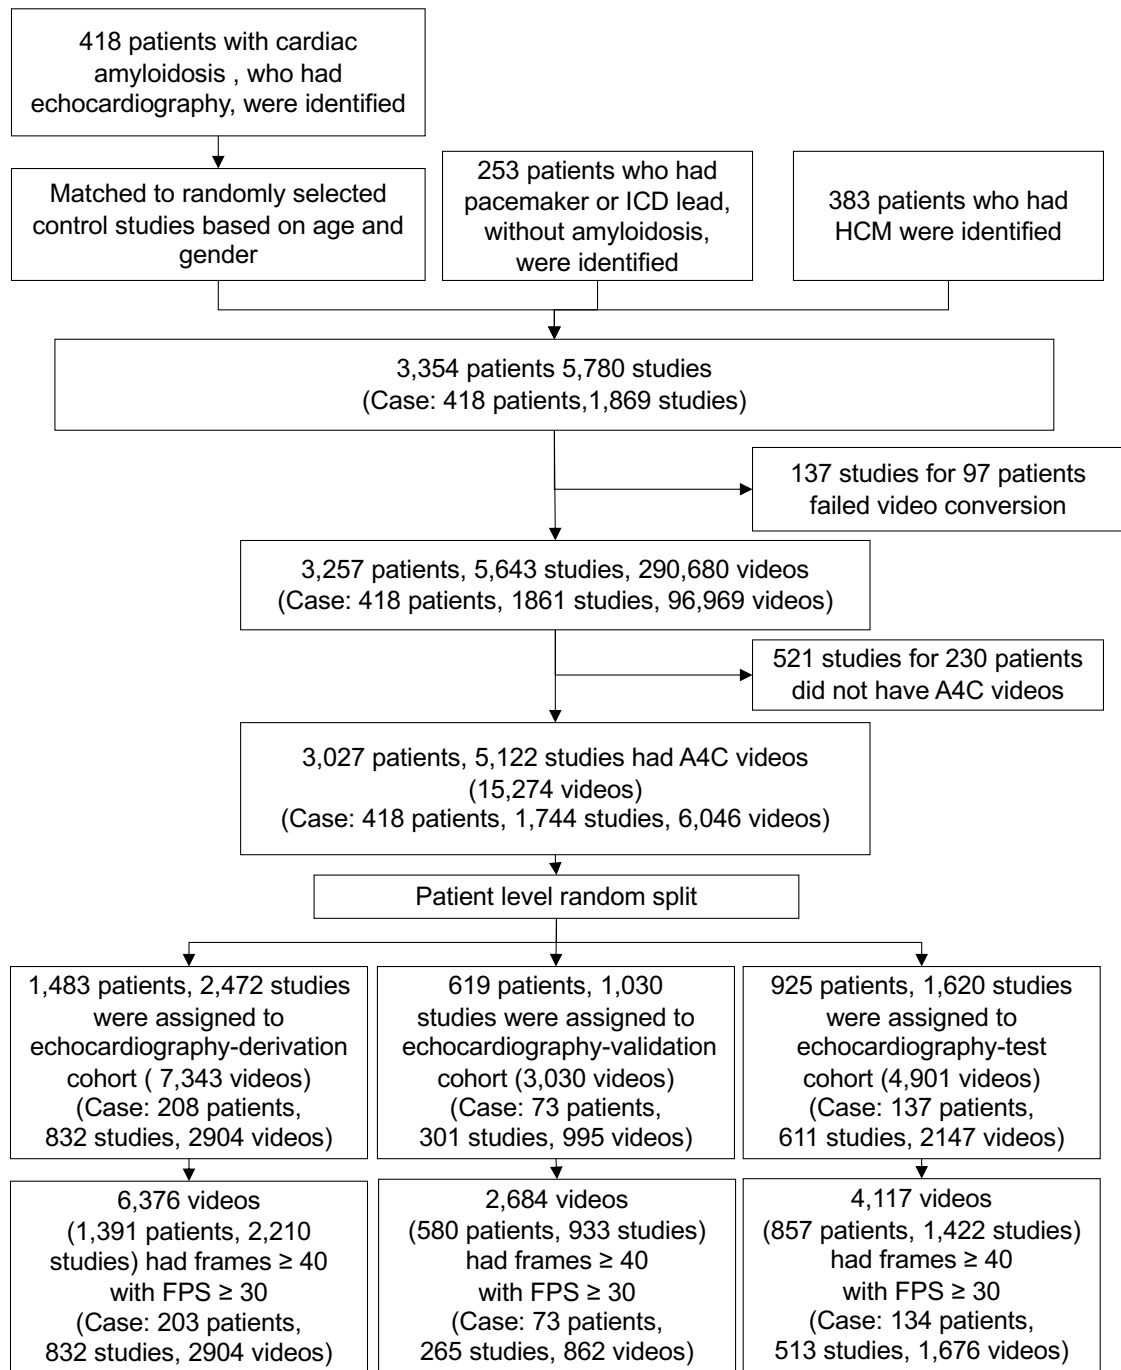

**Supplementary Figure 6. Cohort selection procedure for the BWH echocardiography cohort.**

BWH: Brigham and Women’s Hospital, HCM: hypertrophic cardiomyopathy, ICD: implantable cardioverter defibrillator, FPS: frames per second, A4C: apical 4 chamber view.

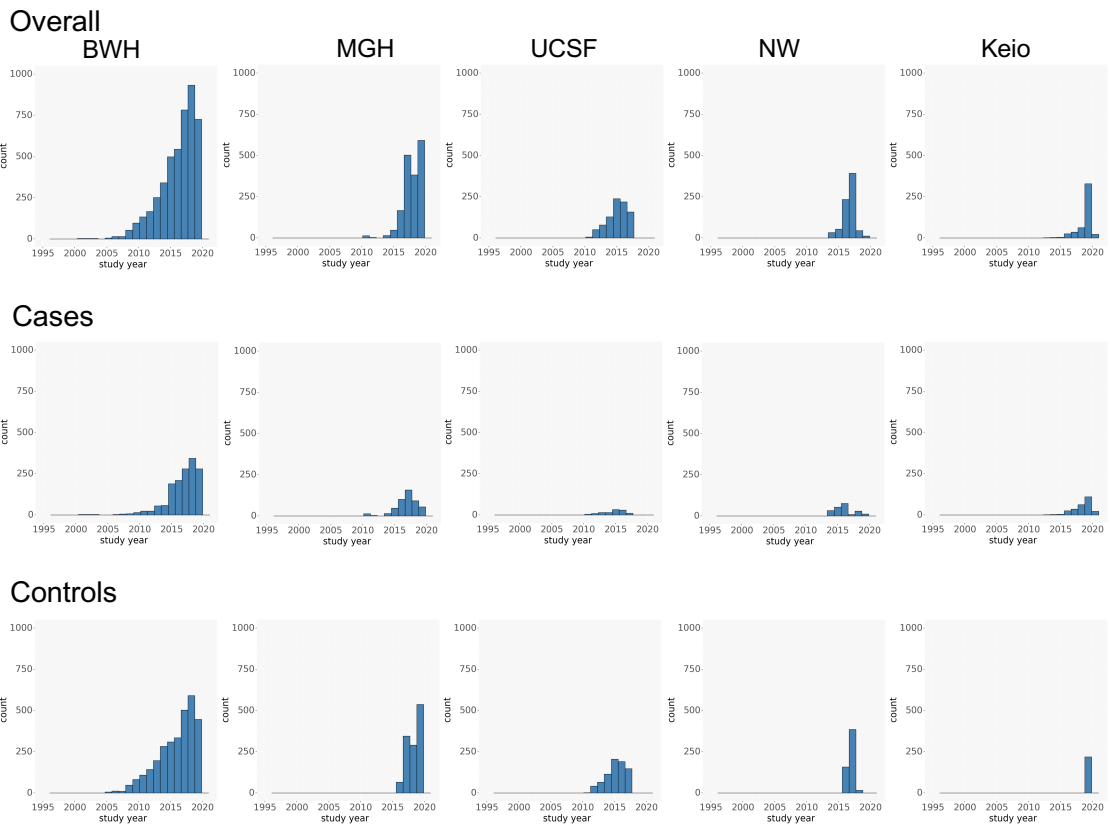

**Supplementary Figure 7. Histogram of the dates of echocardiology studies**

Source data are provided as a Source Data file. BWH: Brigham and Women’s Hospital, MGH: Massachusetts General Hospital, UCSF: University of California San Francisco, NW: Northwestern University, Keio: Keio University.

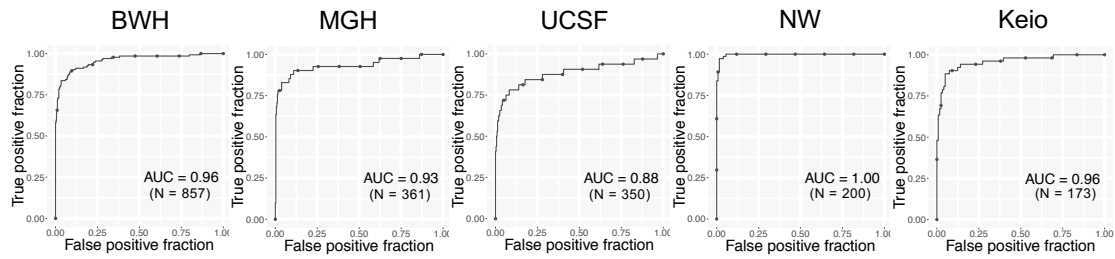

**Supplementary Figure 8. Performance of the echocardiography model using the earliest available study for each patient**

ROC plots for detecting cardiac amyloidosis for each institution. The performance on the test dataset is shown for BWH. N is the numbers of studies. Source data are provided as a Source Data file. BWH: Brigham and Women’s Hospital, MGH: Massachusetts General Hospital, UCSF: University of California San Francisco, NW: Northwestern University, Keio: Keio University. AUC: area under the curve.

## ATTR

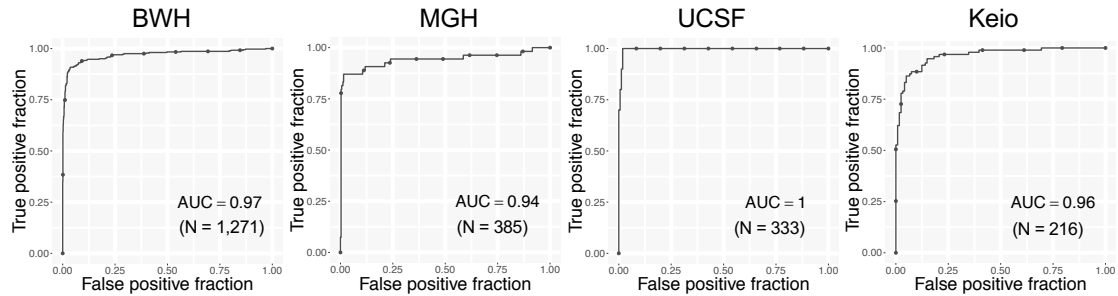

## AL

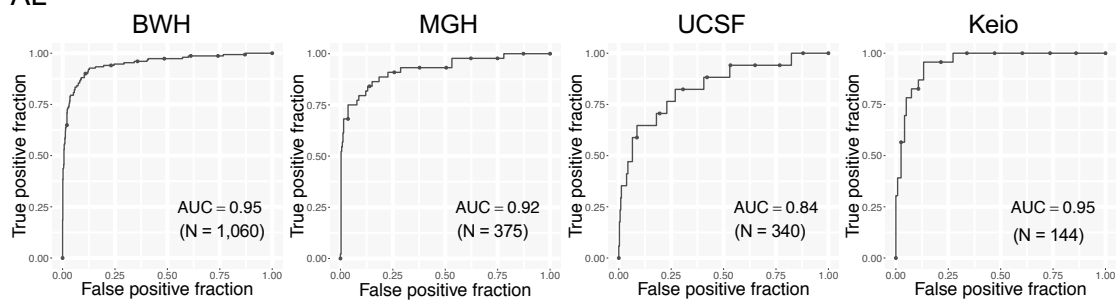

### Supplementary Figure 9. Performance of echocardiography model by amyloid subtype

ROC plots for detecting cardiac amyloidosis by subtype for each institution. The performance on a test dataset is shown for BWH. N is the numbers of studies. Source data are provided as a Source Data file. ATTR: amyloid transthyretin, AL: amyloid light-chain, BWH: Brigham and Women's Hospital, MGH: Massachusetts General Hospital, UCSF: University of California San Francisco, Keio: Keio University, AUC: area under the curve.



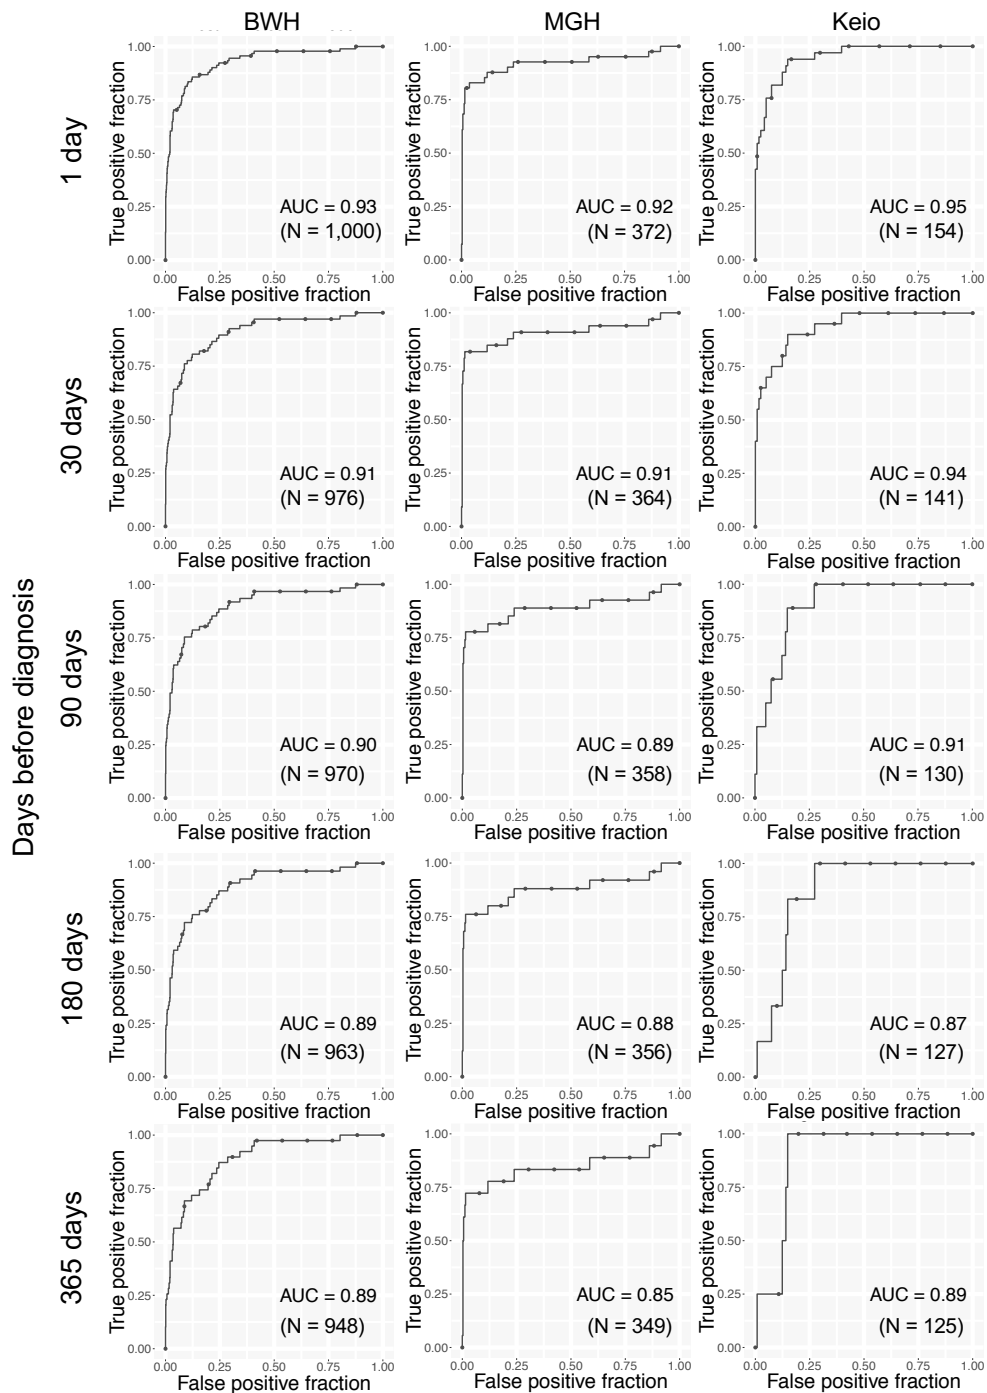

**Supplementary Figure 10. Performance of the echocardiography model on the studies from various time points before diagnosis**

ROC plots for detecting cardiac amyloidosis for each institution. The performance on the test dataset is shown for BWH. Source data are provided as a Source Data file. BWH: Brigham and Women’s Hospital, MGH: Massachusetts General Hospital, Keio: Keio University. AUC: area under the curve.

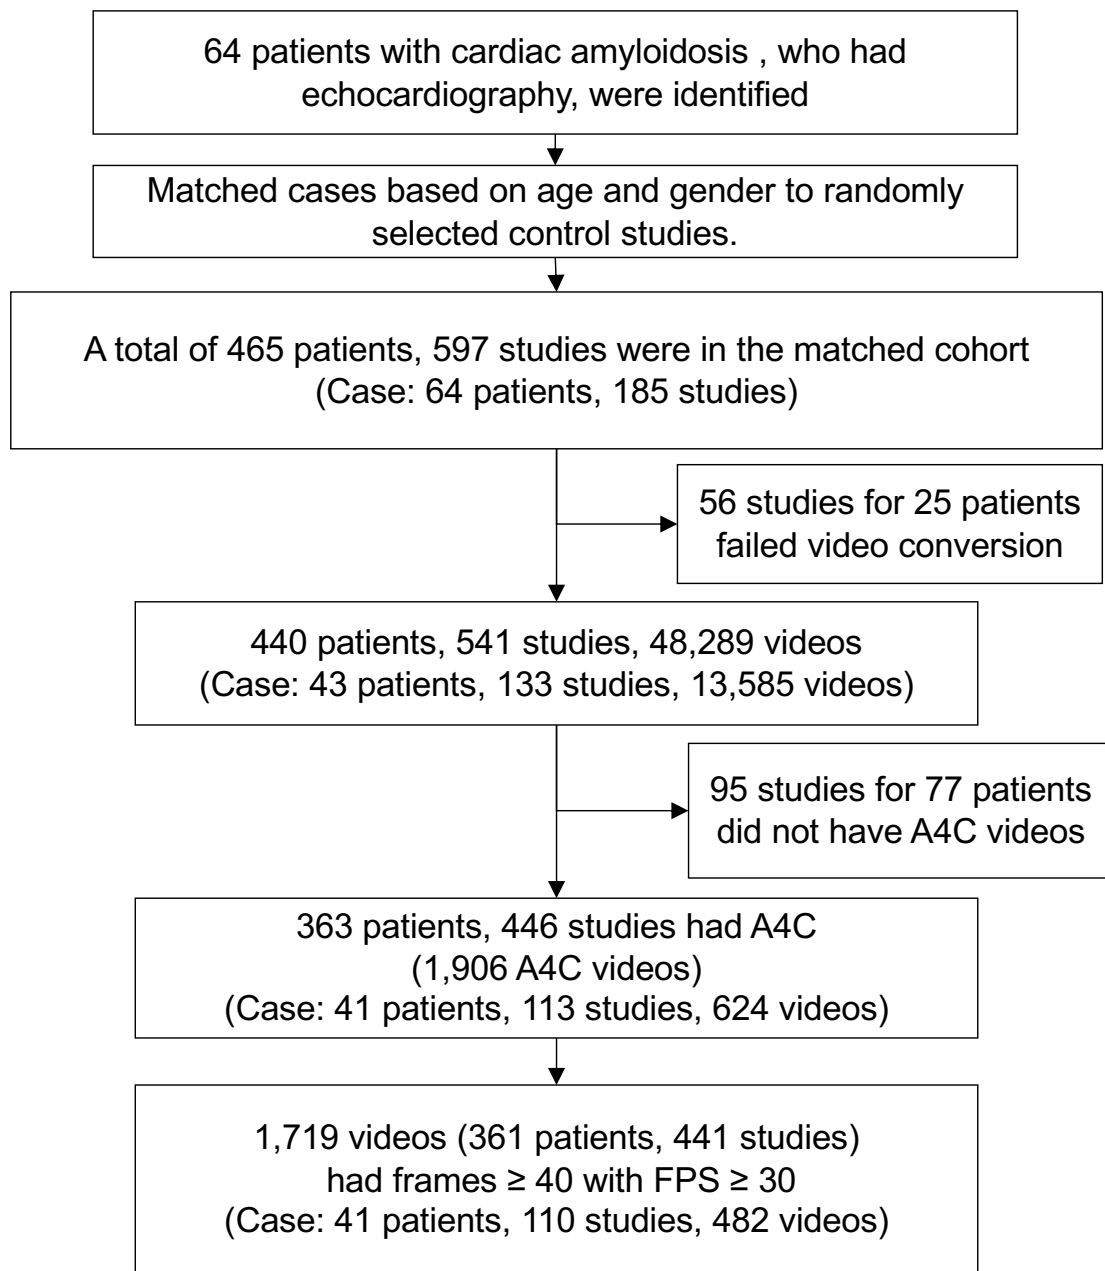

**Supplementary Figure 11. Cohort selection procedure for the MGH echocardiography cohort.**

MGH: Massachusetts General Hospital, FPS: frames per second, A4C: apical 4 chamber view.

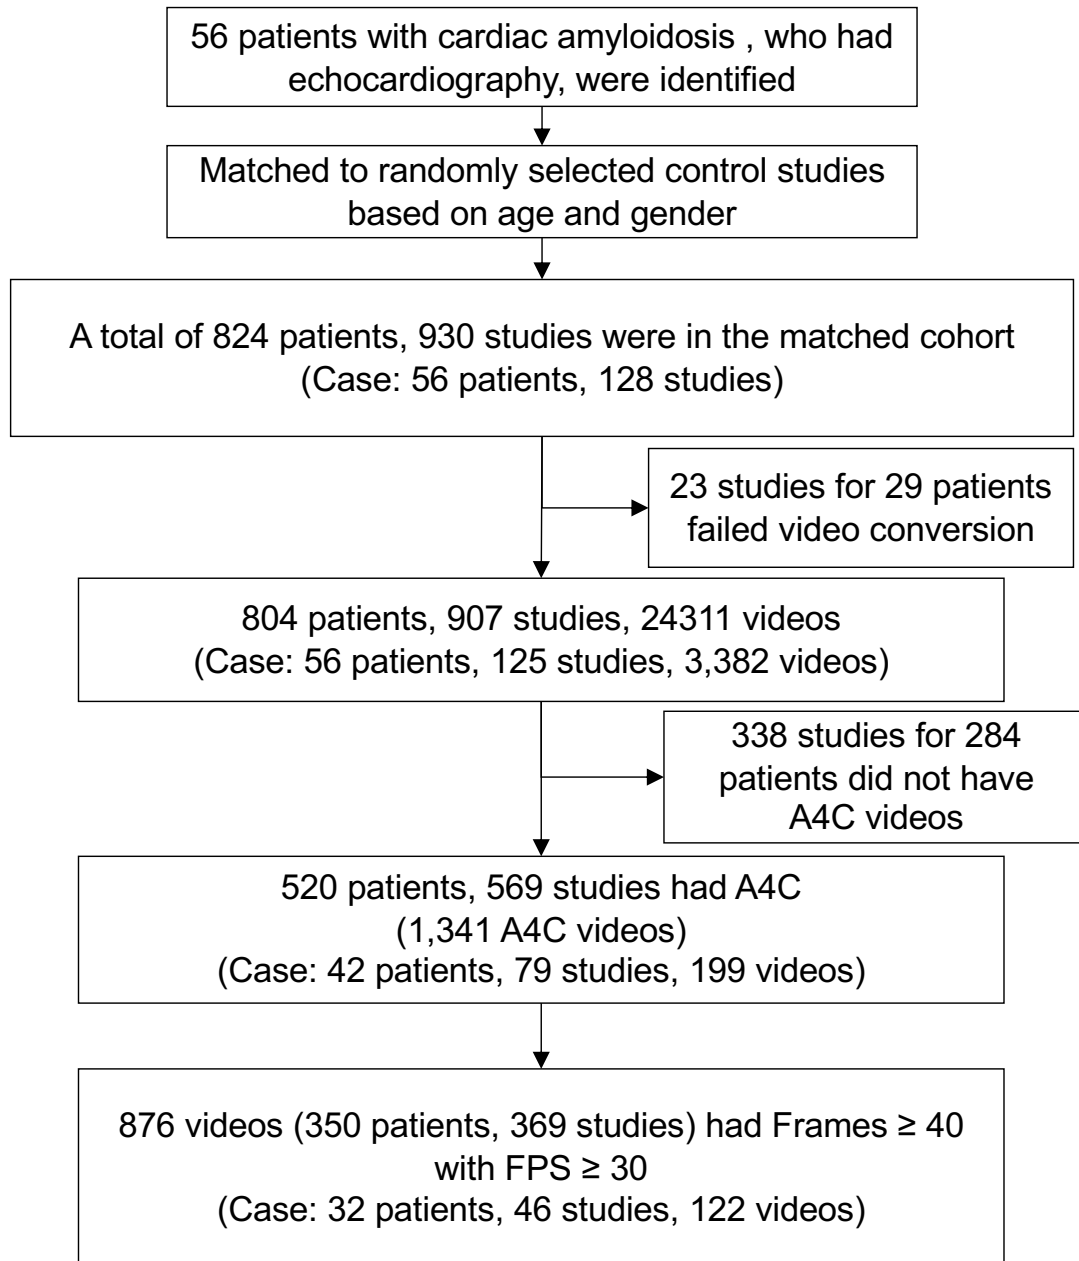

**Supplementary Figure 12. Cohort selection procedure for the UCSF echocardiography cohort.**

UCSF: University of California San Francisco, FPS: frames per second, A4C: apical 4 chamber view.

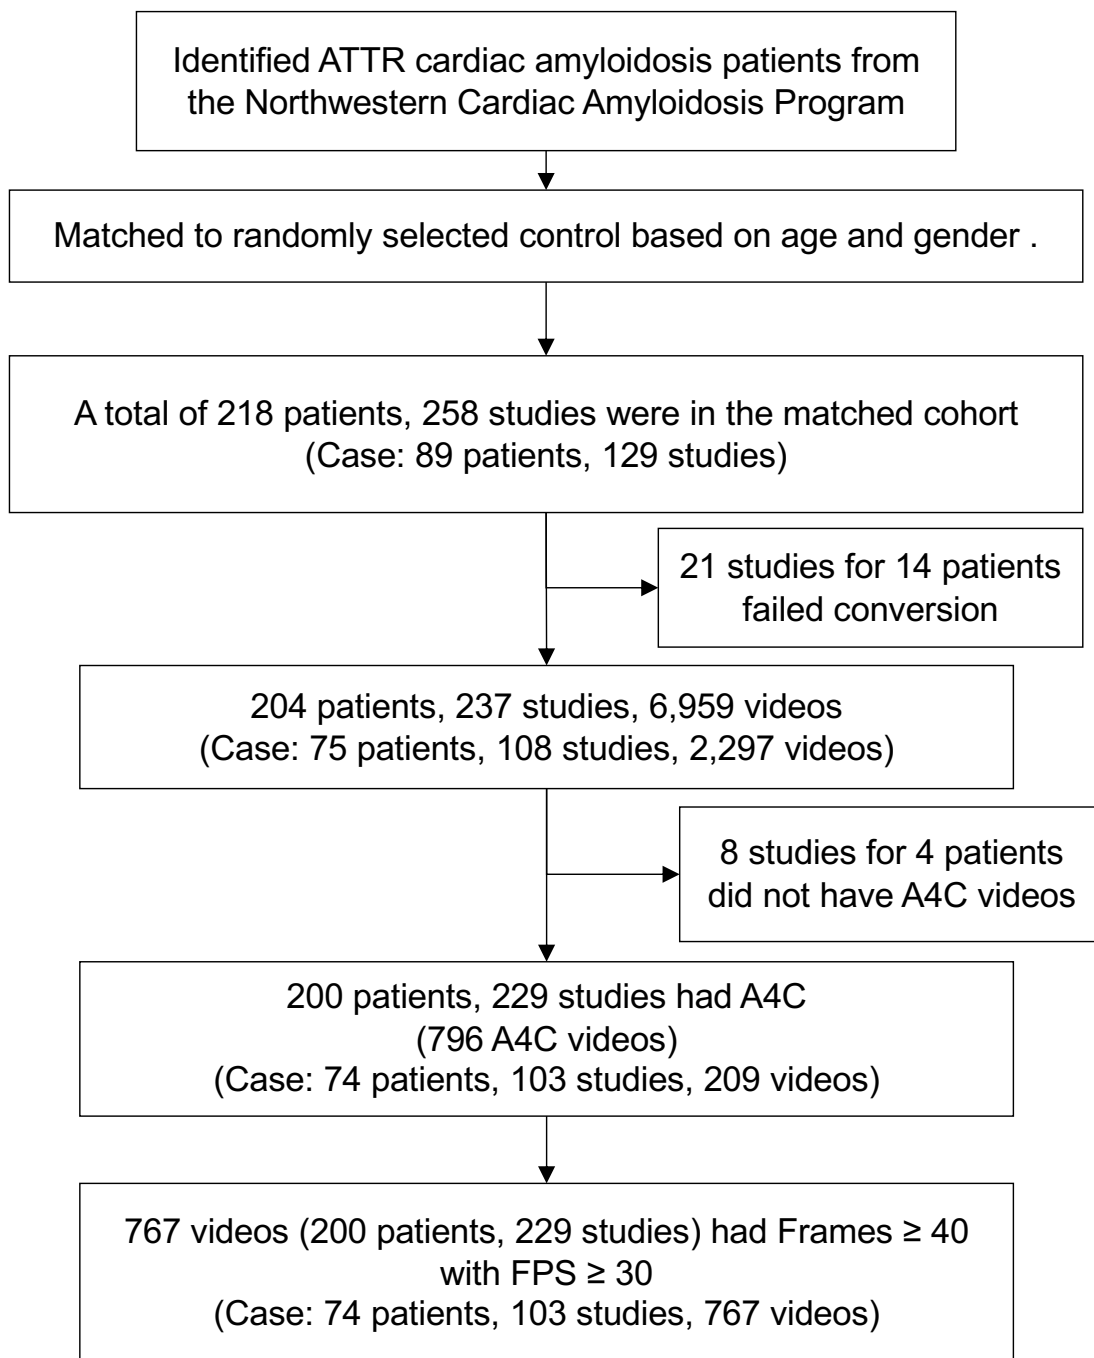

**Supplementary Figure 13. Cohort selection procedure for the NW echocardiography cohort.**

NW: Northwestern University, ATTR: amyloid transthyretin, FPS: frames per second, A4C: apical 4 chamber view.

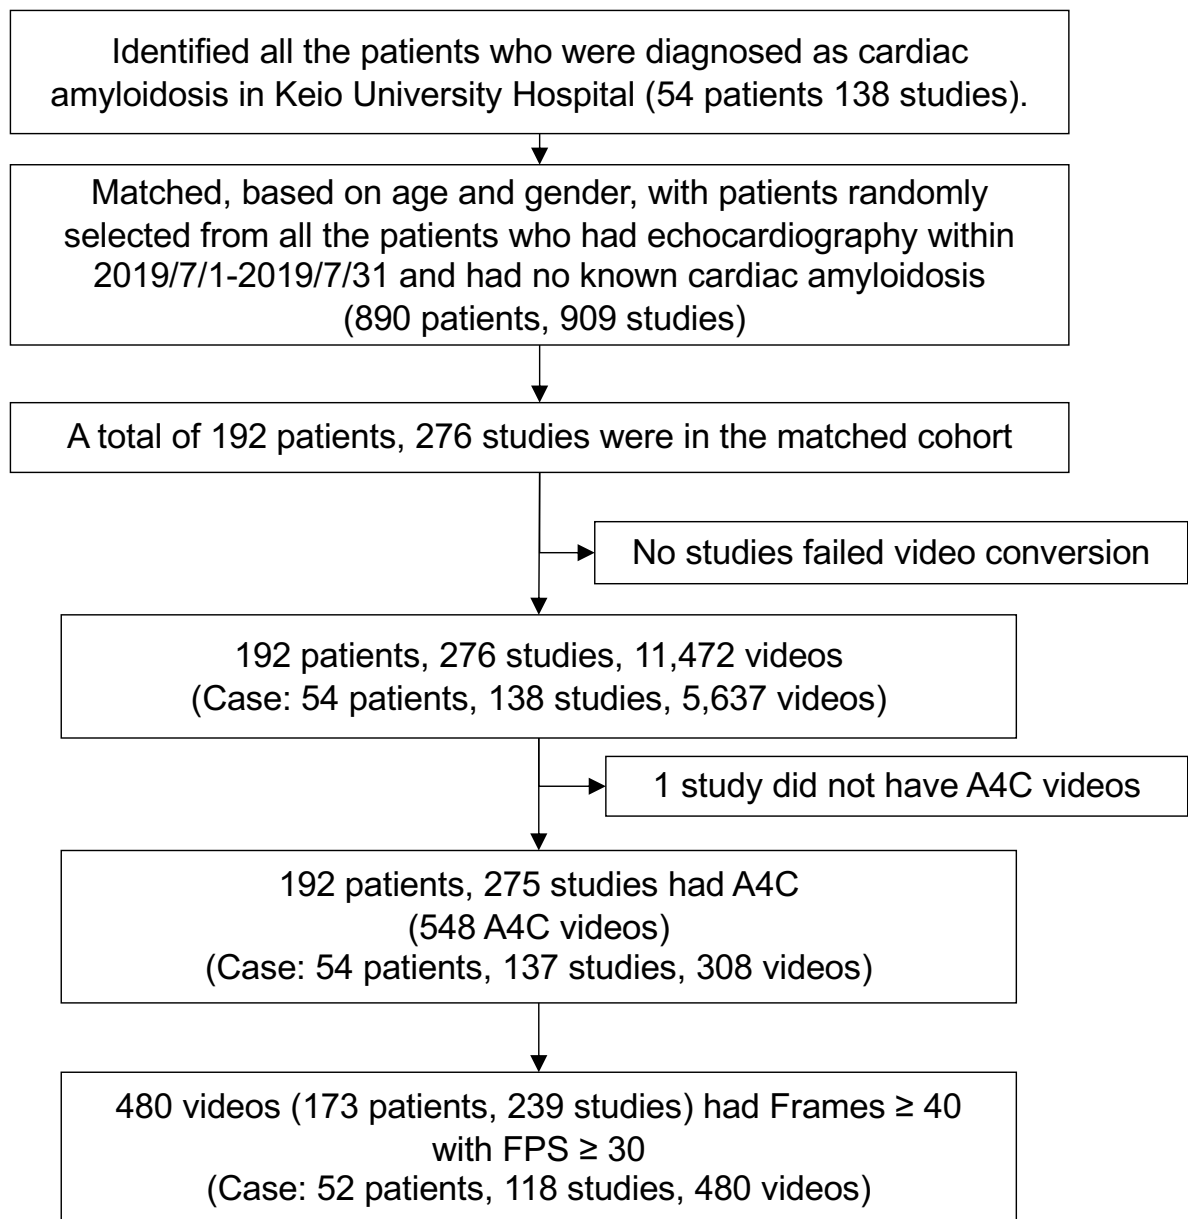

**Supplementary Figure 14. Cohort selection procedure for the Keio echocardiography cohort.**

Keio: Keio University, FPS: frames per second, A4C: apical 4 chamber view.

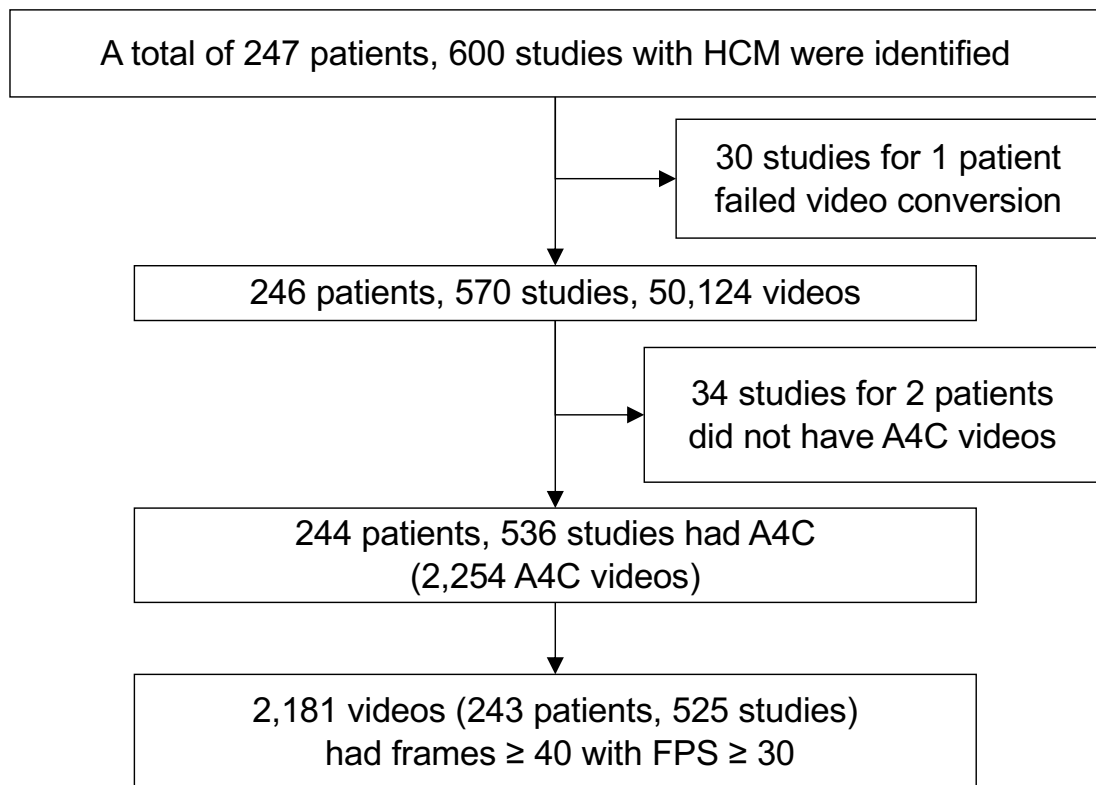

**Supplementary Figure 15. Cohort selection procedure for the MGH echocardiography HCM comparison group.**

MGH: Massachusetts General Hospital, HCM: hypertrophic cardiomyopathy, FPS: frames per second, A4C: apical 4 chamber view.

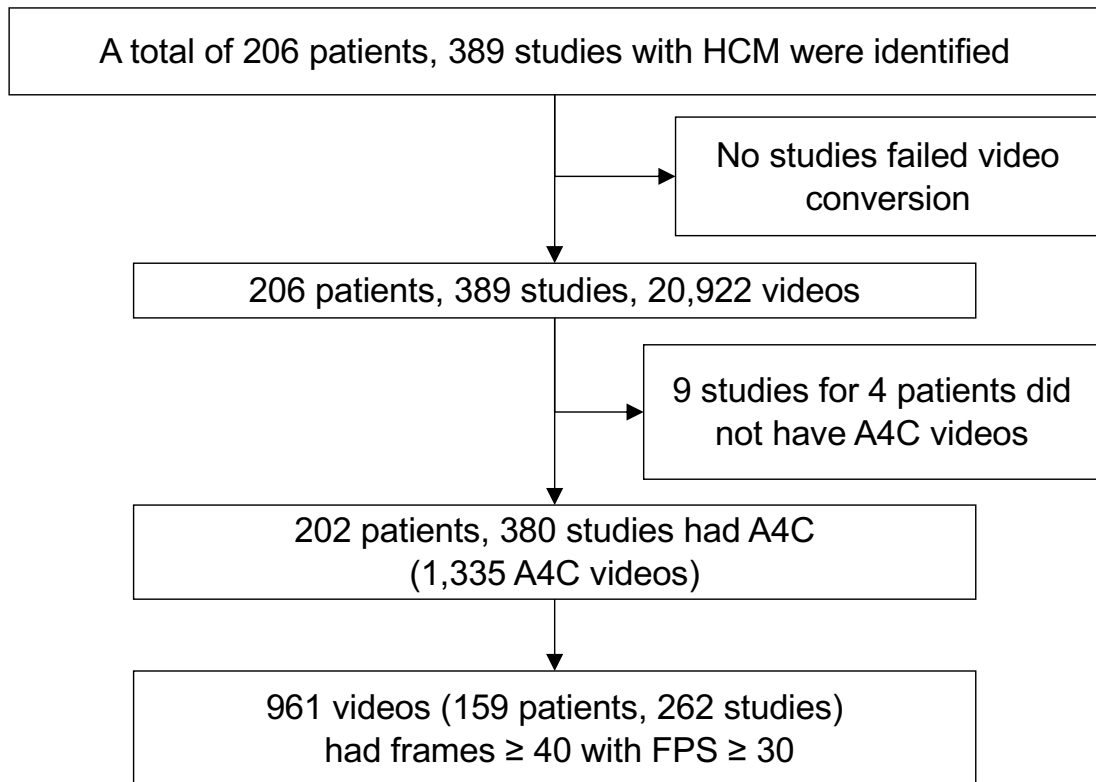

**Supplementary Figure 16. Cohort selection procedure for the UCSF echocardiography HCM comparison group.**

UCSF: University of California San Francisco, HCM: hypertrophic cardiomyopathy, FPS: frames per second, A4C: apical 4 chamber view.

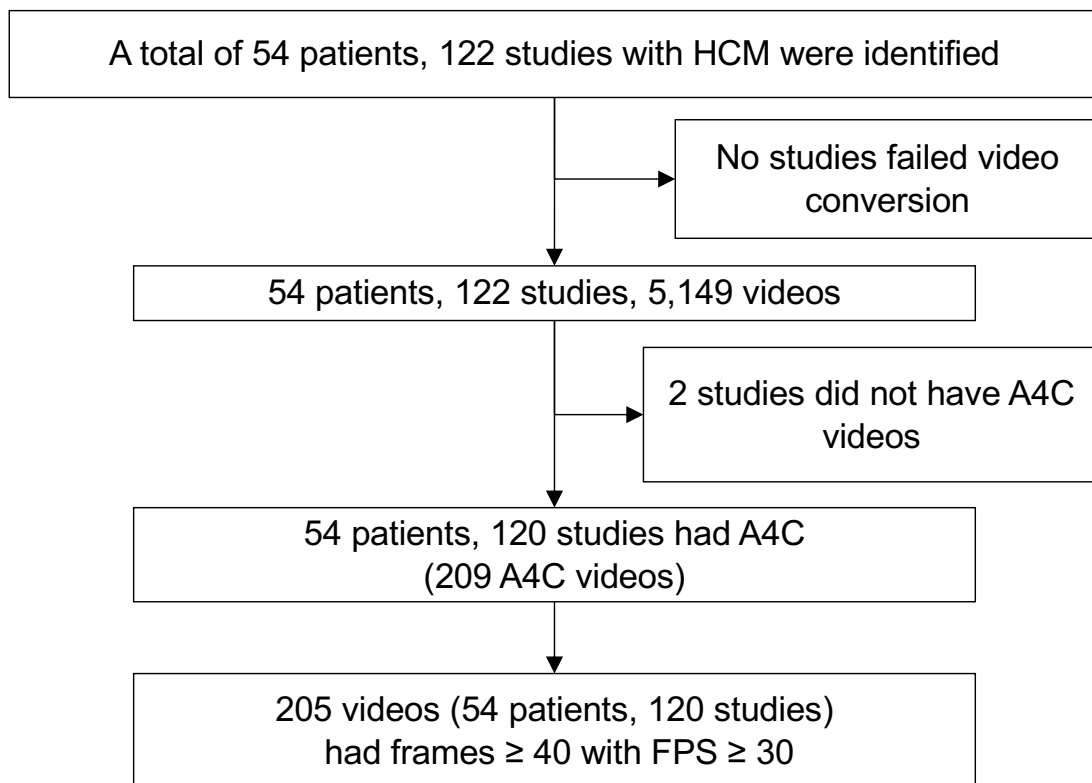

**Supplementary Figure 17. Cohort selection procedure for the Keio echocardiography HCM comparison group.**

Keio: Keio University, HCM: hypertrophic cardiomyopathy, FPS: frames per second, A4C: apical 4 chamber view.



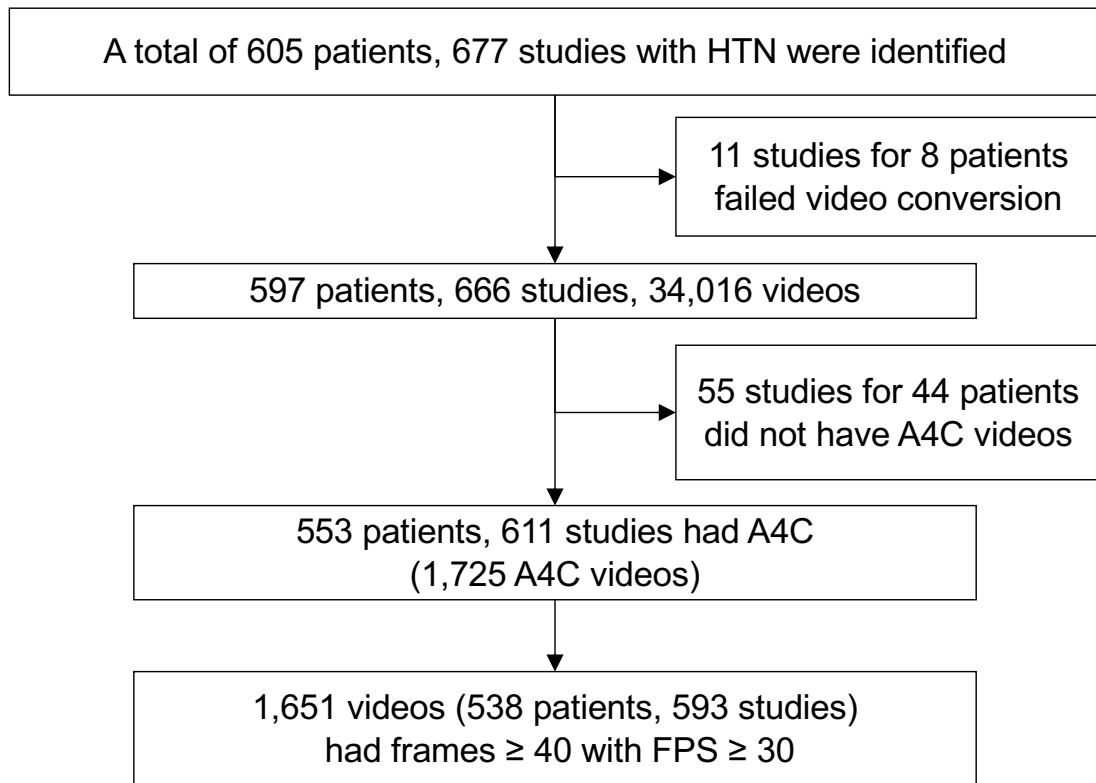

**Supplementary Figure 18. Cohort selection procedure for the BWH echocardiography hypertension comparison group.**

BWH: Brigham and Women's Hospital, HTN: hypertension, FPS: frames per second, A4C: apical 4 chamber view.

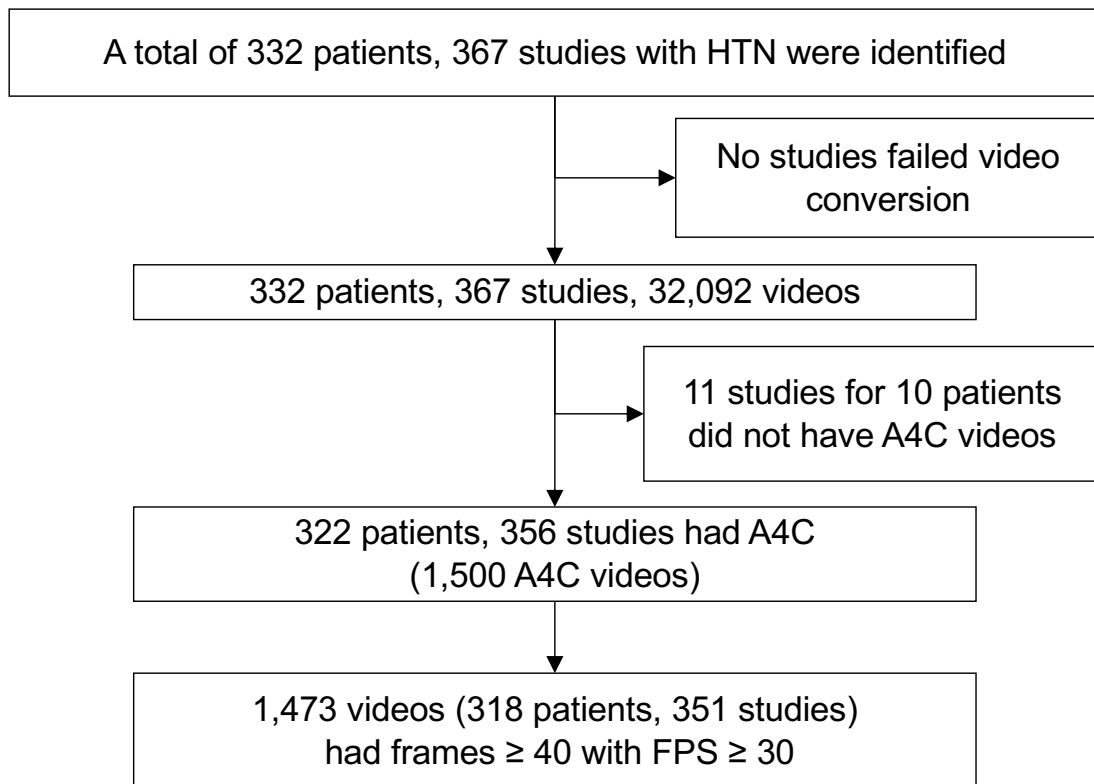

**Supplementary Figure 19. Cohort selection procedure for the MGH echocardiography hypertension comparison group.**

MGH: Massachusetts General Hospital, HTN: hypertension, FPS: frames per second, A4C: apical 4 chamber view.

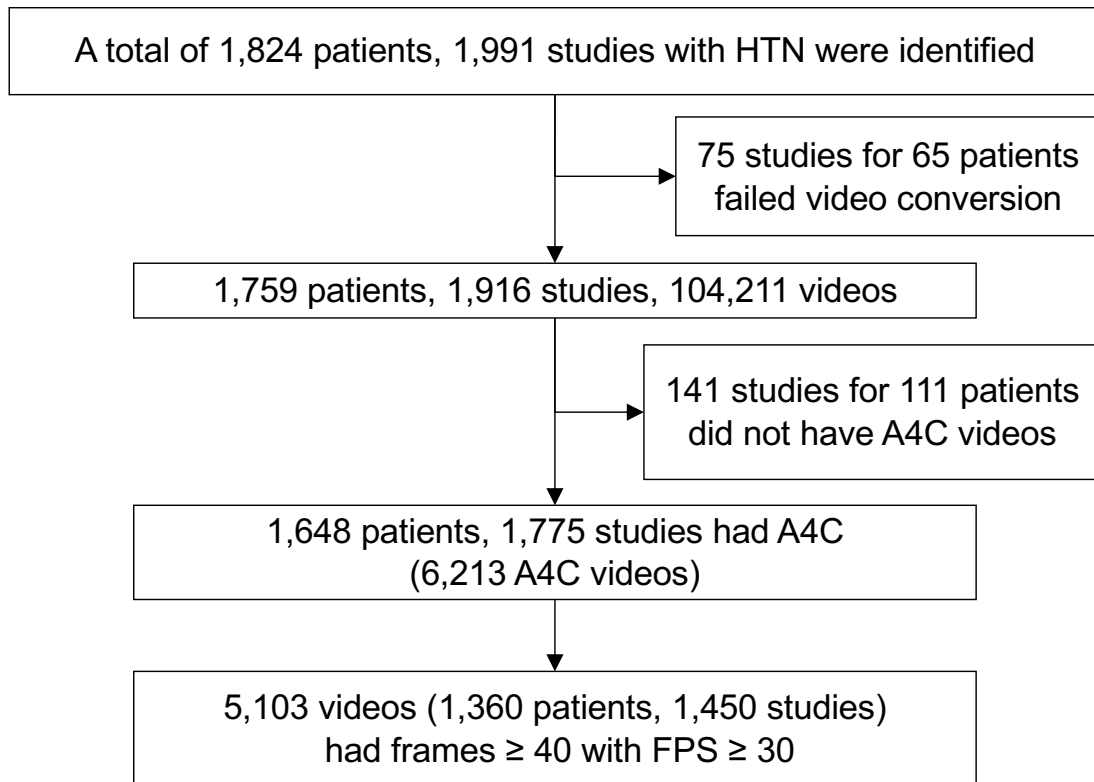

**Supplementary Figure 20. Cohort selection procedure for the UCSF echocardiography hypertension comparison group.**

UCSF: University of California San Francisco, HTN: hypertension, FPS: frames per second, A4C: apical 4 chamber view.

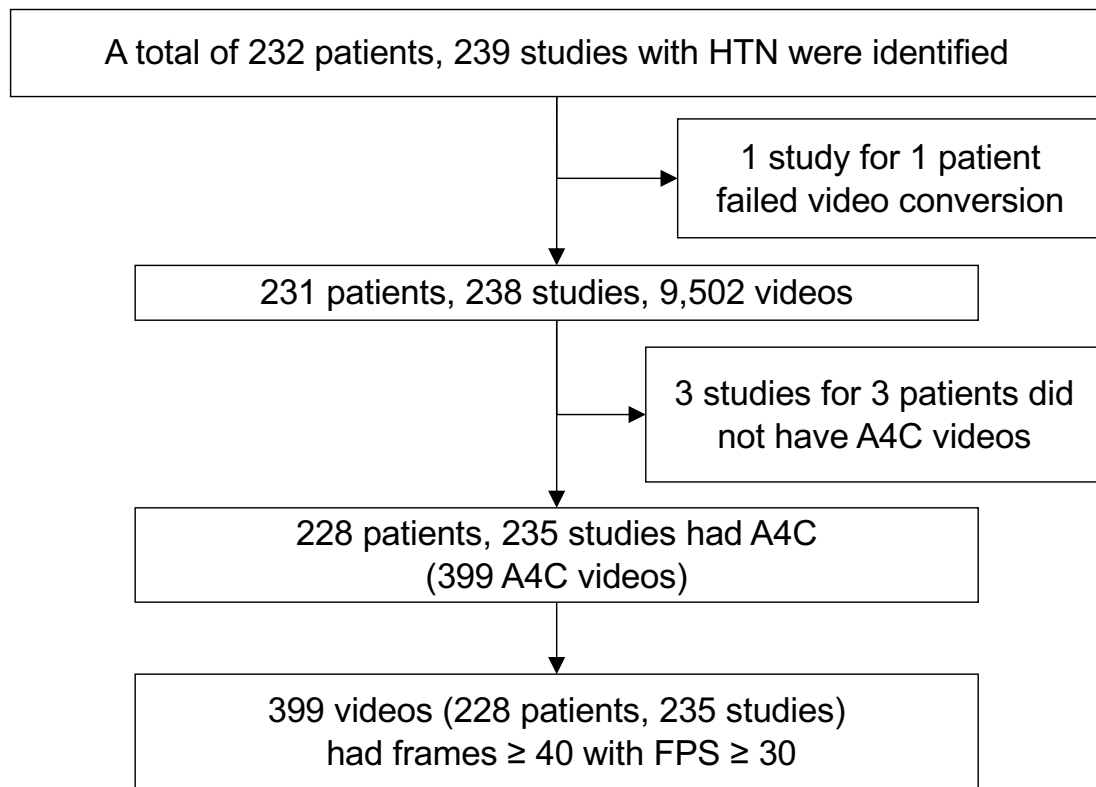

**Supplementary Figure 21. Cohort selection procedure for the Keio echocardiography hypertension comparison group.**

Keio: Keio University, HTN: hypertension, FPS: frames per second, A4C: apical 4 chamber view.

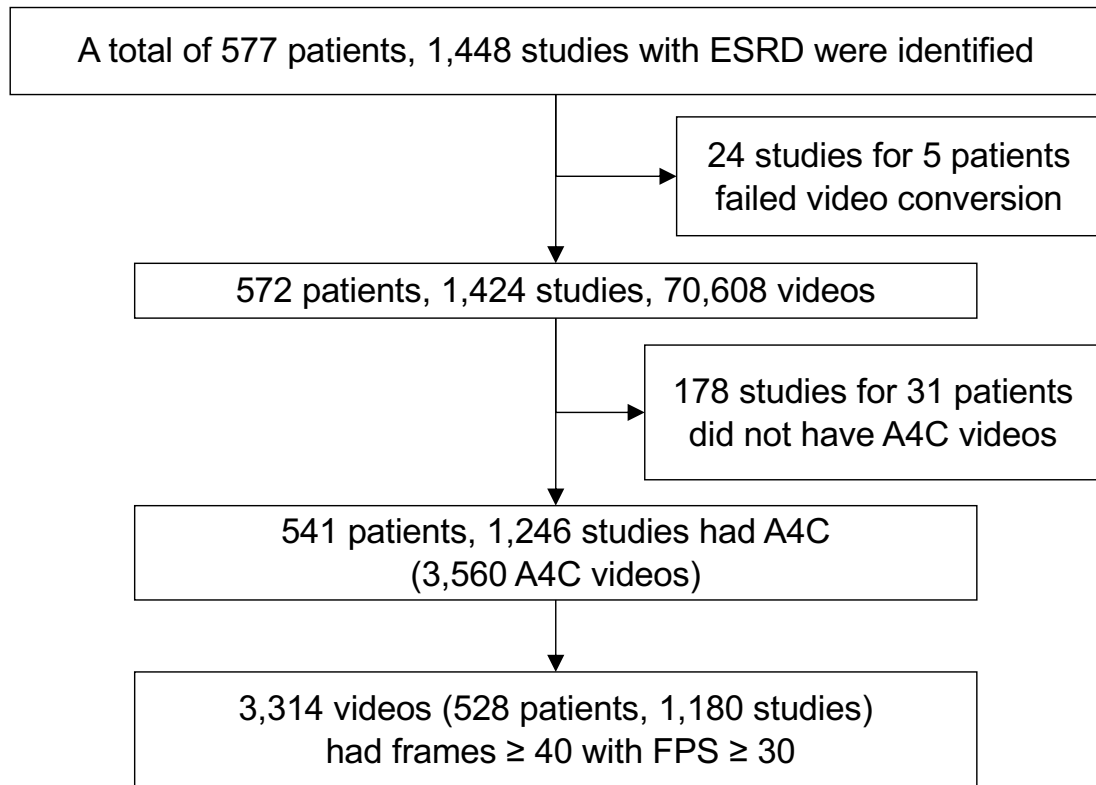

**Supplementary Figure 22. Cohort selection procedure for the BWH echocardiography end-stage renal disease controls.**

BWH: Brigham and Women's Hospital, ESRD: end-stage renal disease, FPS: frames per second, A4C: apical 4 chamber view.

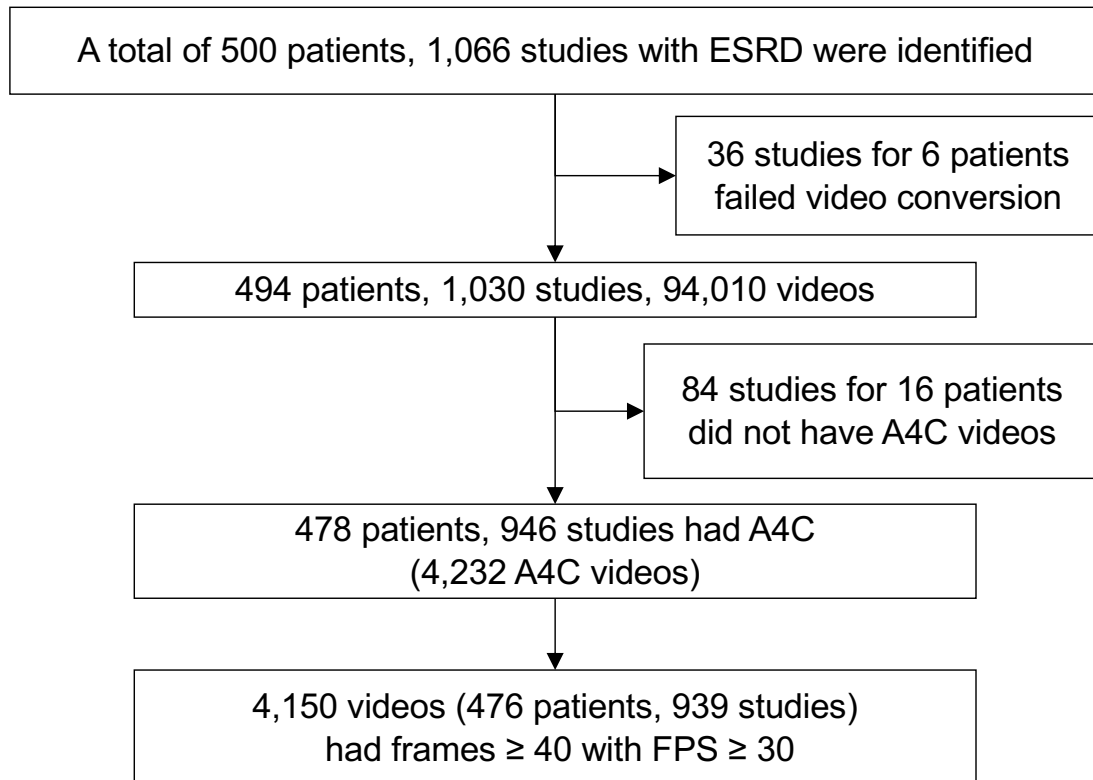

**Supplementary Figure 23. Cohort selection procedure for the MGH echocardiography end-stage renal disease controls.**

MGH: Massachusetts General Hospital, ESRD: end-stage renal disease, FPS: frames per second, A4C: apical 4 chamber view.

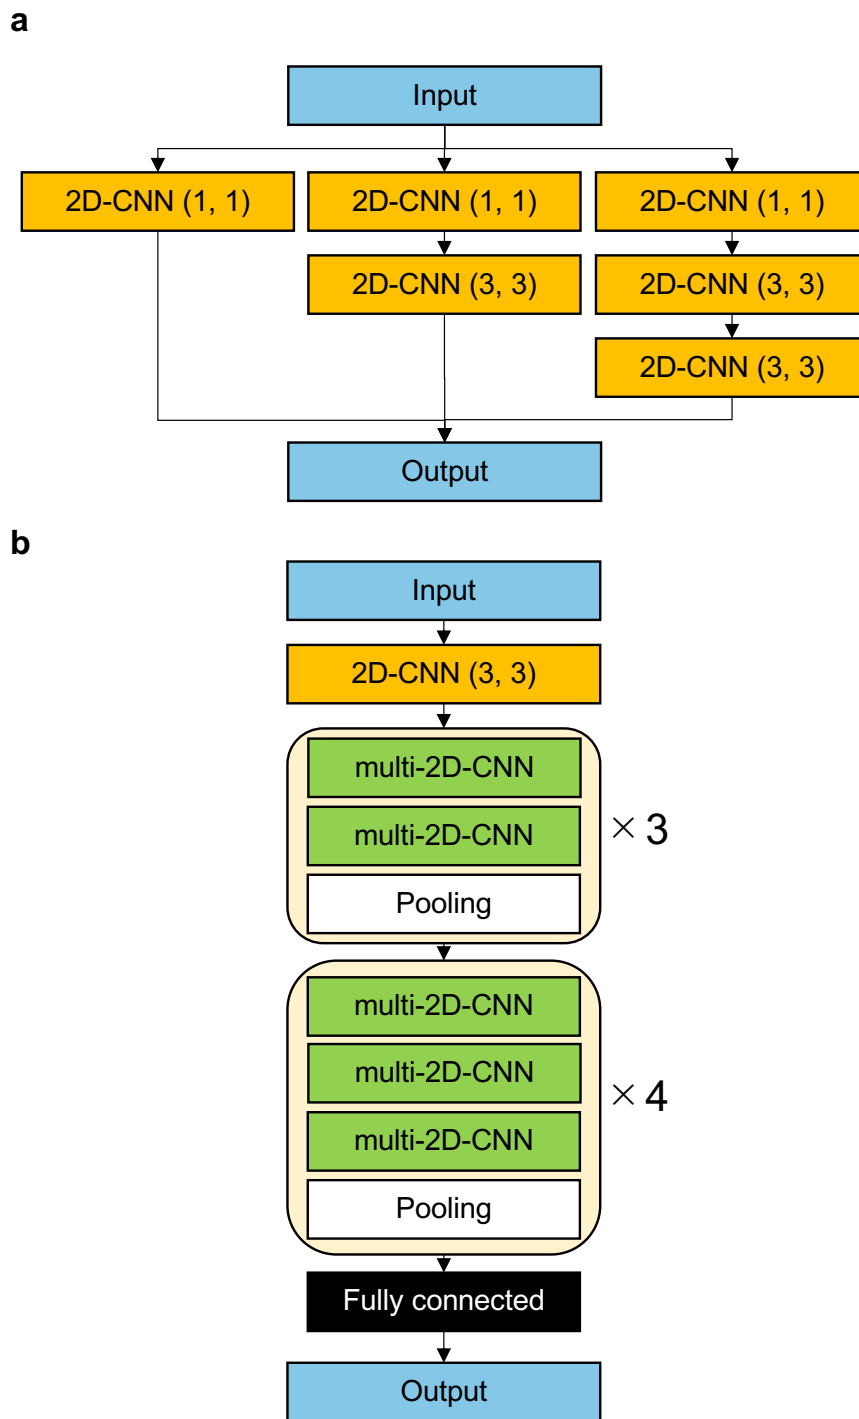

**Supplementary Figure 24. Schematic drawing of the network structure of ECG model.**

(A) Structure of the multi-2D-CNN module and (B) the full network structure of ECG model. ECG: electrocardiogram, CNN: convolutional neural network.

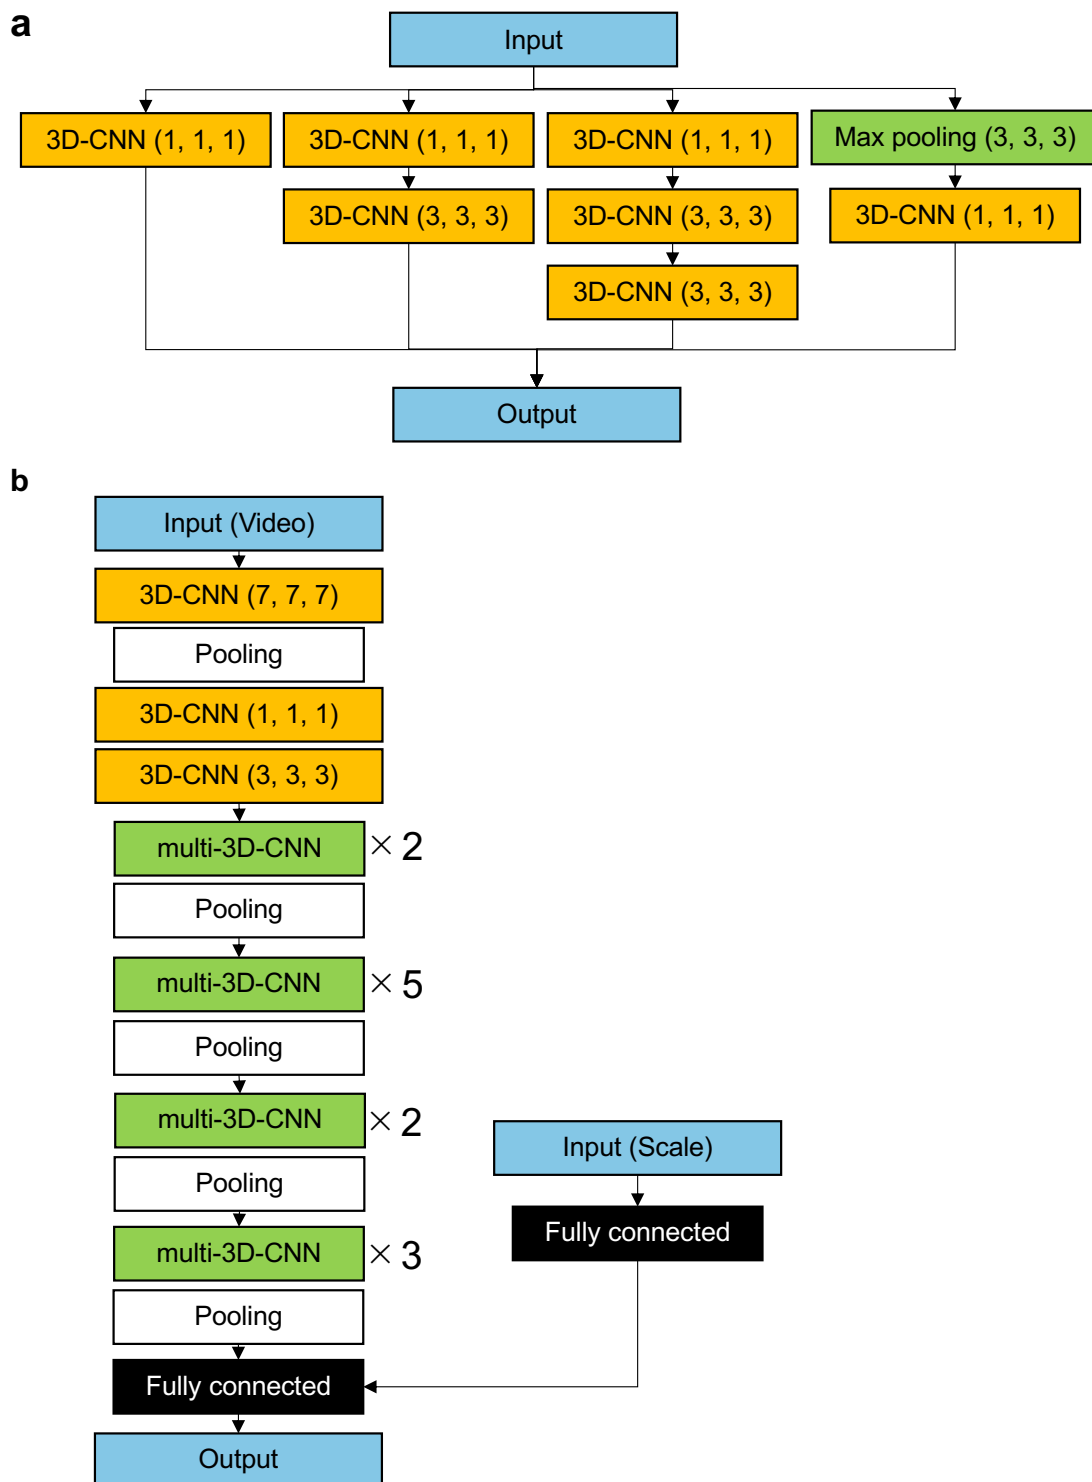

**Supplementary Figure 25. Schematic drawing of the network structure of echocardiography model.**

(A) Structure of the multi-3D-CNN module and (B) the full network structure of echocardiography model. CNN: convolutional neural network.



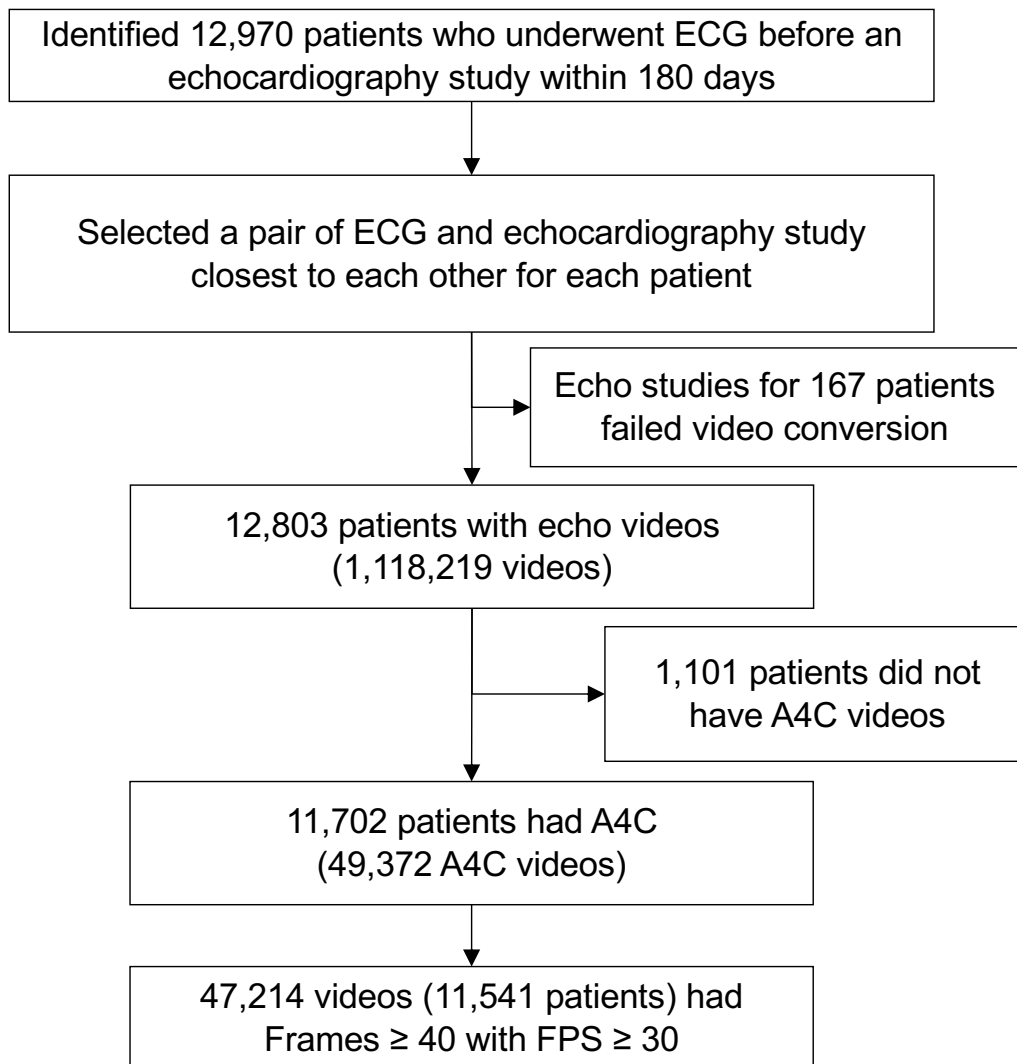

**Supplementary Figure 26. Cohort selection procedure for the MGH surveillance cohort.**

MGH: Massachusetts General Hospital, ECG: electrocardiogram, FPS: frames per second, A4C: apical 4 chamber view.

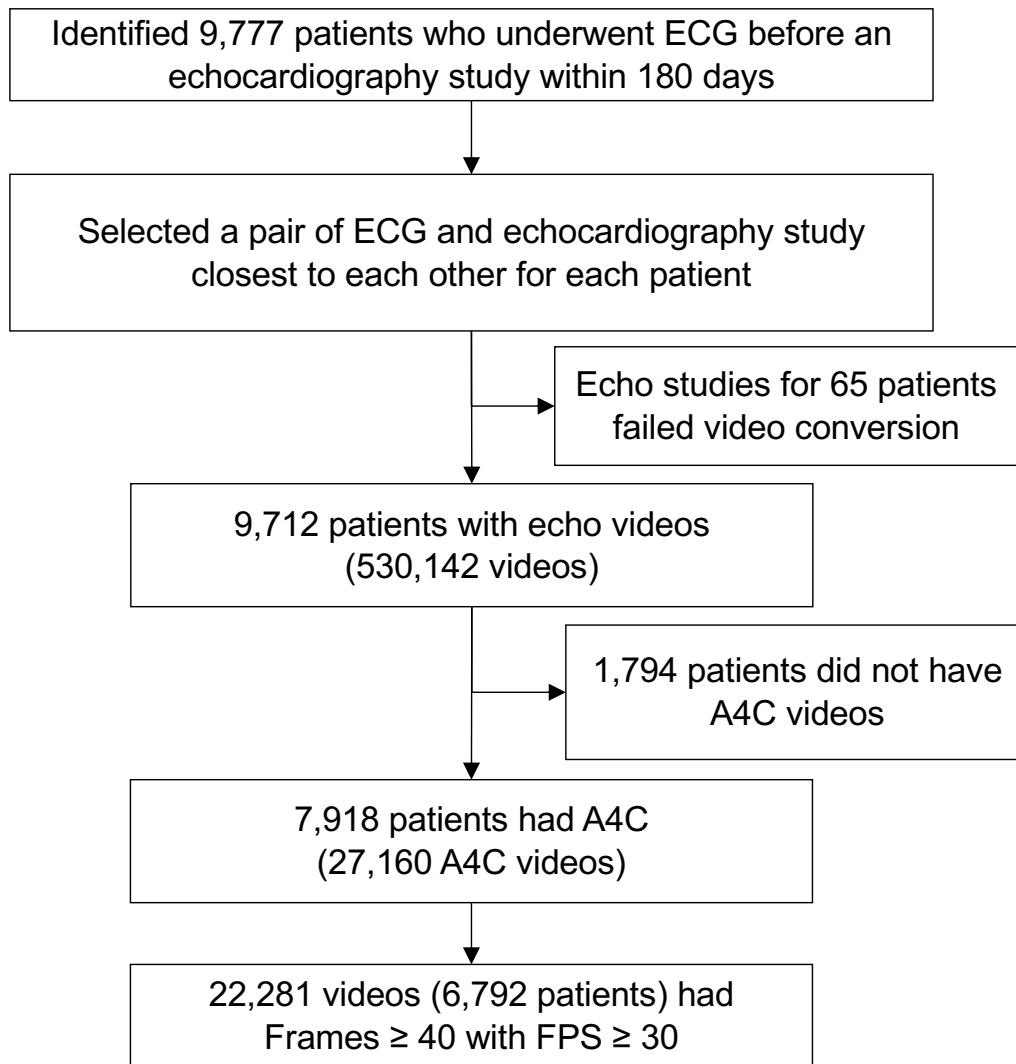

**Supplementary Figure 27. Cohort selection procedure for the UCSF surveillance cohort.**

UCSF: University of California San Francisco, ECG: electrocardiogram, FPS: frames per second, A4C: apical 4 chamber view.
